# Supplementary material
Source: PubMed Central journal article supplement (PMC2586901)
Supplement: NIHMS76003-supplement-Supplementary_.pdf [file NIHMS76003-supplement-Supplementary_.pdf]

# An Improved Method for Screening and MALDI-TOF MS Sequencing of Encoded Combinatorial Libraries

Bi-Huang Hu, Marsha Ritter Jones and Phillip B. Messersmith\*

*Northwestern University  
Biomedical Engineering Department  
2145 Sheridan Road  
Evanston, IL 60208*

## **Supporting Information**

### **Optimization of MALDI-TOF MS Methods**

We examined four conditions of sample preparation for MALDI-TOF MS sequencing of a single bead: **a.** a bead was loaded on a sample position of a standard MALDI-TOF MS sample plate, followed by addition of matrix solution onto the bead and irradiation at 365 nm for one hr; **b.** a bead was loaded on a sample position of the sample plate, followed by irradiation at 365 nm in acetonitrile-water (1:1) (2  $\mu$ l) for one hr and then addition of matrix solution onto the bead; **c.** a bead was placed into a micro tube containing acetonitrile-water (1:1) and irradiated at 365 nm for one hr, from which an aliquot of liquid was mixed with matrix solution in 1:1 ratio, and loaded onto a sample position of the sample plate; **d.** a bead was loaded on a sample position of the sample plate, followed by addition of matrix solution onto the bead. After the samples were air-dried, MALDI-TOF MS analysis indicated that the sequence of the peptide can be obtained from the spectra at all conditions. Among them, the spectra from conditions a and c had a noisy baseline and the spectrum from condition d had weak signal intensities, while the spectrum from condition b had the highest peak signals and lowest baseline noise. It was subsequently determined that a 15 min-irradiation at 365 nm was sufficient to obtain a mass spectrum of good quality.

### **TGase Library Screening Using a Fluorescent Gln Substrate**

In our first attempt to perform the on-resin TGase enzyme assay directly using a fluorescent TGase substrate, we conjugated the known glutamine substrate peptide Gln-Gln-Ile-Val (Parameswaran, K. N.; Velasco, P. T.; Wilson, J.; Lorand, L. *Proc. Natl. Acad. Sci. U.S.A* **1990**, 87, 8472-8475.) to a fluorescent dansyl label (dansyl- $\epsilon$ -aminocaproyl-Gln-Gln-Ile-Val (DAG)), for study of Lys peptide substrates. The on-resin assay involved TGase-catalyzed incorporation of DAG onto a resin-bound Lys peptide.

As a result, resin-bound peptides were expected to be fluorescently labeled to an extent that reflected the quality of the peptide as a substrate for TGase enzyme. However, the native fluorescence of PEGA resin beads at the excitation and emission bands of dansyl, and nonspecific staining of resin beads by DAG used in the enzyme reaction, precluded screening using this method.

High concentration of the fluorescent glutamine peptide DAG used in the assay solution caused nonspecific fluorescent labeling of all beads, resulting in that all beads were evenly and equally fluorescent under a fluorescence microscope. Therefore, we developed a new two-stage screening procedure: 1. TGase-catalyzed incorporation of a desthiobiotinylated glutamine peptide, or cadaverine onto the resin-bound Lys peptides, or Gln peptides, and magnetic separation of the desthiobiotinylated resin-peptides; 2. removal of magnetic labeling, and relabeling of the desthiobiotinylated resin-peptides with low concentration of rhodamine B-streptavidin and fluorescent separation.

### **Streptavidin-Magnetic Particles of First-Stage Magnetic Screening**

PEGA resin and biotin-PEGA resin were incubated with streptavidin-magnetic particles with different sizes for 30 min, respectively.

Magnetic separation using a magnet showed that streptavidin microbeads (50 nm, Miltenyi Biotec) nonspecifically labeled both of the resin beads, MagnaBind streptavidin beads (4  $\mu\text{m}$ , Pierce) labeled biotin-PEGA resin and partially labeled PEGA resin, and streptavidin magnetic particles (8.0-9.9  $\mu\text{m}$ , Spherotech) specifically labeled biotin-PEGA resin. These results indicated the size of the magnetic particles was a key factor to the specificity of magnetic labeling. It seemed that smaller or nano magnetic particles could be entrapped and adhered inside the resin beads to magnetically label any beads. Therefore, we chose to use the streptavidin magnetic particles (8.0-9.9  $\mu\text{m}$ ) for our magnetic labeling.

### **On-resin Cross-linking Enzyme Assay of Lysine library**

The first on-resin TGase-catalyzed cross-linking assay was performed by incubating the synthesized lysine library (770,000-1,270,000 beads) in a buffer solution of 100 mM MOPS, pH 7.2, 1 mM DOQ, 10 mM  $\text{CaCl}_2$ , 10 mM DTT, and 1 mM EDTA with TGase (0.25 U/ml) at room temperature for 10 min. After exhausted wash, the library was incubated with 2 ml of streptavidin-magnetic particles (8.8-9.0  $\mu\text{m}$ ) in 30 ml of PBS, pH 7.2, 0.1% BSA for 2 hrs. Magnetic separation by a magnet showed that none of beads were magnetically labeled. After wash, the on-resin TGase-catalyzed cross-linking assay was performed again by incubating the library at the same condition as above for 30 min. The library was treated as above again with the streptavidin-magnetic particles (8.8-9.0  $\mu\text{m}$ ). Magnetic separation by a magnet showed that a tenth of beads (v/v) were magnetically labeled and selected. It was obvious that the selected beads had a darker color than the sorted-out ones. At the same conditions with different reaction time, we can conclude that the magnetic labeling of resin-bound peptide library was desthiobiotin-specific from the assay results.

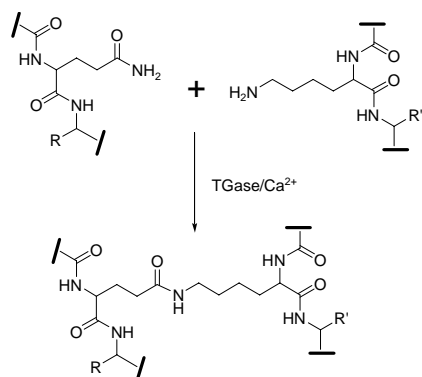

Scheme S1. The reaction catalyzed by TGase.

Table S1. Protected amino acids used for Gln-Gln-Ile-Val ladder synthesis

| Amino acid       | Primary tag | MW*    | Secondary tag | MW*   | PD† |
|------------------|-------------|--------|---------------|-------|-----|
| Fmoc-Ahx-OH      | Boc-Abu-OH  | 85.05  |               |       |     |
| Fmoc-Val-OH      | Boc-Val-OH  | 99.07  |               |       |     |
| Fmoc-Ile-OH      | Boc-Ile-OH  | 113.08 | Boc-Abu-OH    | 85.05 | -28 |
| Fmoc-Gln(Trt)-OH | Boc-Gln-OH  | 128.06 |               |       |     |

\*: Residual molecular weight; †: Molecular weight difference from primary tag.  
 Ahx: 6-aminohexanoic acid; Abu: 4-aminobutyric acid.

Table S2. Protected amino acids used for combinatorial library by ladder synthesis

| Amino acid         | Primary tag       | MW*    | Secondary tag         | MW*    |
|--------------------|-------------------|--------|-----------------------|--------|
| Fmoc-Ala-OH        | Boc-Ala-OH        | 71.04  |                       |        |
| Fmoc-Arg (Pbf) -OH | Boc-Arg (Mtr) -OH | 156.10 |                       |        |
| Fmoc-Asn (Trt) -OH | Boc-Asn (Trt) -OH | 114.04 |                       |        |
| Fmoc-Asp (OBu) -OH | Boc-Asp (OBu) -OH | 115.03 | Ac-Asp (OBu) -OH      | 157.05 |
| Fmoc-Gln (Trt) -OH | Boc-Gln (Trt) -OH | 128.06 | Ac-Gln (Trt) -OH      | 170.08 |
| Fmoc-Glu (OBu) -OH | Boc-Glu (OBu) -OH | 129.04 |                       |        |
| Fmoc-Gly-OH        | Boc-Gly-OH        | 57.02  |                       |        |
| Fmoc-His (Trt) -OH | Boc-His (Trt) -OH | 137.06 |                       |        |
| Fmoc-Ile-OH        | Boc-Ile-OH        | 113.08 | Boc-Me-Ile-OH         | 127.08 |
| Fmoc-Leu-OH        | Boc-Leu-OH        | 113.08 | Boc- $\alpha$ -Abu-OH | 85.05  |
| Fmoc-Lys (Boc) -OH | Boc-Lys (Boc) -OH | 128.09 | Ac-Dab (Boc) -OH      | 142.08 |
| Fmoc-Met-OH        | Boc-Met-OH        | 131.04 |                       |        |
| Fmoc-Phe-OH        | Boc-Phe-OH        | 147.07 |                       |        |
| Fmoc-Pro-OH        | Boc-Pro-OH        | 97.05  |                       |        |
| Fmoc-Ser (tBu) -OH | Boc-Ser (tBu) -OH | 87.03  |                       |        |
| Fmoc-Thr (tBu) -OH | Boc-Thr (tBu) -OH | 101.05 |                       |        |
| Fmoc-Trp (Boc) -OH | Boc-Trp-OH        | 186.08 |                       |        |
| Fmoc-Tyr (tBu) -OH | Boc-Tyr (tBu) -OH | 163.06 |                       |        |
| Fmoc-Val-OH        | Boc-Val-OH        | 99.07  | Boc-Ile-OH            | 113.08 |

\* Residual molecular weight; Abu: 4-aminobutyric acid; Dab: diaminobutyric acid.

# Bead Sorting Experiment

## Materials and methods

The peptides on resin beads were labeled with rhodamine (Molecular Probes, cat# S871, wavelengths are Abs at 570 nm and Em at 590 nm).

Instrument: The COPAS Plus was used for the experiment. Performance of the instrument was verified with control particles before the experiments. The following optical filters were used: excitation 514 nm, emission 585 nm.

Sheath solution: 1X PBS with 0.1% Tween-20.

Sample solution: 1X PBS with 0.1% Tween-20 and 0.3% BSA.

## Results

The COPAS instrument measures five parameters of an object: TOF (Time of Flight, equivalent to the length of the object), EXT (EXTinction, equivalent to the optical density), Green, Yellow and Red fluorescence intensities. Data are displayed in real time (dot-plot) with the COPAS software. This enables the user to define a region for analyzing and sorting samples based on size or fluorescence intensity properties.

To achieve the optimal sorting result, the following settings were performed:

- (1) Sorting based on global fluorescence intensity level of a bead. At this setting, beads with the highest overall fluorescence intensity levels were collected (Figure S2).
- (2) Sorting based on fluorescence peak height. Profiler, an add-on module of the COPAS instrument, continuously monitors the fluorescence intensity change of a bead as it enters and exits the laser beam. The result is displayed as a stack of fluorescence “slices”, representing fluorescence intensity levels at different locations of the bead. Peak height is the level of the “highest” fluorescence intensity slice (see figure S1). At this setting, beads with the highest “peak height” levels were collected (Figure S3).

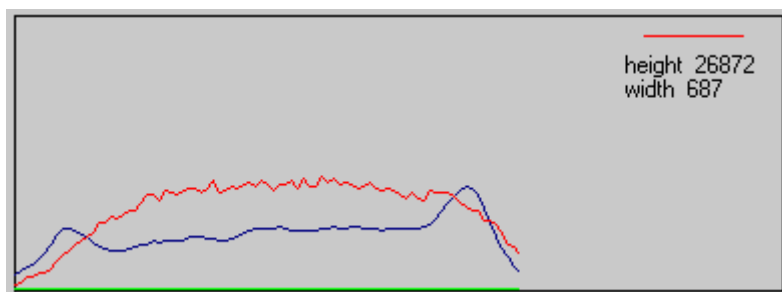

**Figure S1.** Profiles of a single bead. Blue trace: extinction; Red trace: red fluorescence.

- (3) Sorting based on TOF normalized global fluorescence intensity. To compensate for the larger surface area of bigger beads and thus the higher measured fluorescence intensity levels, the measured fluorescence intensity is normalized by dividing it with the bead's TOF value. At this setting, beads with the highest normalized fluorescence intensity levels were collected (Figure S4).

Individual beads were collected into 96-well microtiter plates at one bead per well. The corresponding measured parameters were recorded for all of the analyzed beads. Downstream experiments will be performed to analyze the protein affinity of peptides attached to these beads.

| Row | Column | TOF  | Red |
|-----|--------|------|-----|
| A   | 1      | 957  | 346 |
| A   | 2      | 809  | 440 |
| A   | 3      | 683  | 296 |
| A   | 4      | 813  | 280 |
| A   | 5      | 746  | 262 |
| A   | 6      | 935  | 264 |
| A   | 7      | 888  | 284 |
| A   | 8      | 1032 | 306 |
| A   | 9      | 899  | 292 |
| A   | 10     | 704  | 277 |
| A   | 11     | 786  | 332 |
| A   | 12     | 935  | 278 |

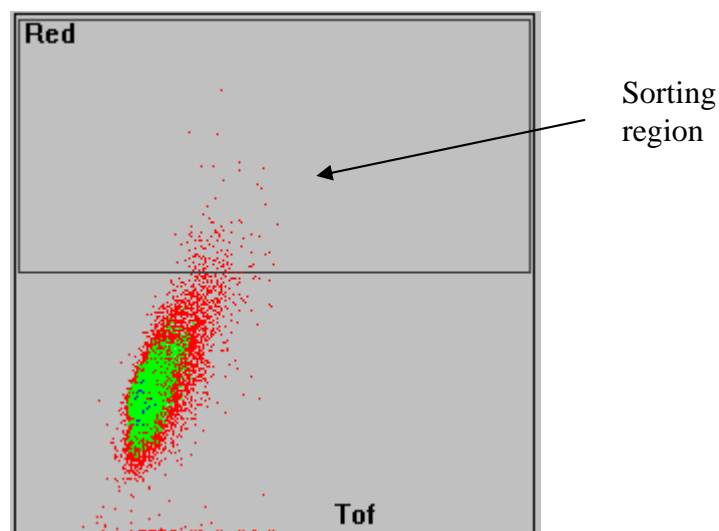

**Figure S2.** Sorting based on global fluorescence intensity of individual beads. Sorting region represents the top 1% brightest beads. Average TOF: 558, average Red: 145; Sorted TOF: 786, Sorted Red: 291. The table shows a sample of collected beads with their dispensed locations and corresponding measured values.

| Row | Column | TOF | Red | Red peak height/100 |
|-----|--------|-----|-----|---------------------|
| A   | 1      | 792 | 717 | 170                 |
| A   | 2      | 552 | 361 | 218                 |
| A   | 3      | 640 | 512 | 345                 |
| A   | 4      | 880 | 558 | 296                 |
| A   | 5      | 760 | 567 | 307                 |
| A   | 6      | 808 | 622 | 328                 |
| A   | 7      | 632 | 527 | 346                 |
| A   | 8      | 736 | 501 | 279                 |
| A   | 9      | 600 | 423 | 245                 |
| A   | 10     | 656 | 506 | 304                 |
| A   | 11     | 504 | 321 | 227                 |
| A   | 12     | 536 | 427 | 241                 |

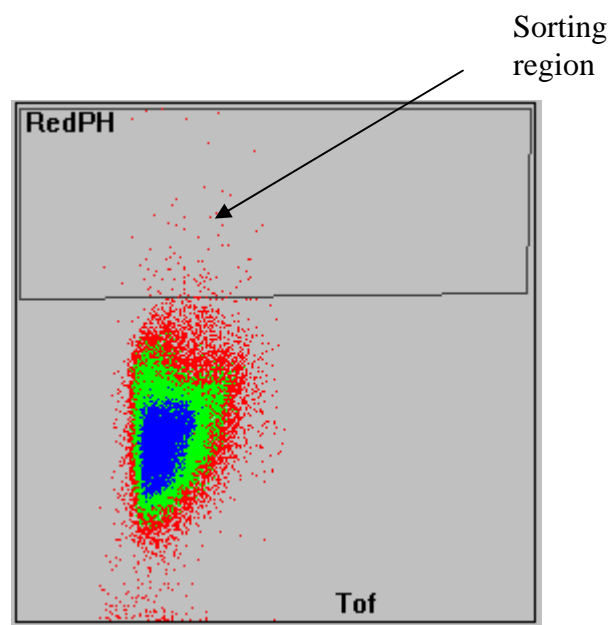

**Figure S3.** Sorting based on red fluorescence peak height of individual beads. Sorting region represents the top 0.2 % brightest beads. Average TOF: 592, average Red: 250, average Red peak height, 22200; Sorted TOF: 692, Sorted Red: 507, Sorted Red peak height 27623. The table shows a sample of collected beads with their dispensed locations and corresponding measured values.

| Row | Column | TOF | Red | Normalized Red |
|-----|--------|-----|-----|----------------|
| A   | 1      | 744 | 595 | 80             |
| A   | 2      | 720 | 596 | 83             |
| A   | 3      | 704 | 563 | 80             |
| A   | 4      | 680 | 545 | 80             |
| A   | 5      | 712 | 563 | 79             |
| A   | 6      | 648 | 514 | 79             |
| A   | 7      | 616 | 550 | 89             |
| A   | 8      | 736 | 589 | 80             |
| A   | 9      | 760 | 617 | 81             |
| A   | 10     | 688 | 574 | 83             |
| A   | 11     | 776 | 652 | 84             |
| A   | 12     | 720 | 582 | 81             |

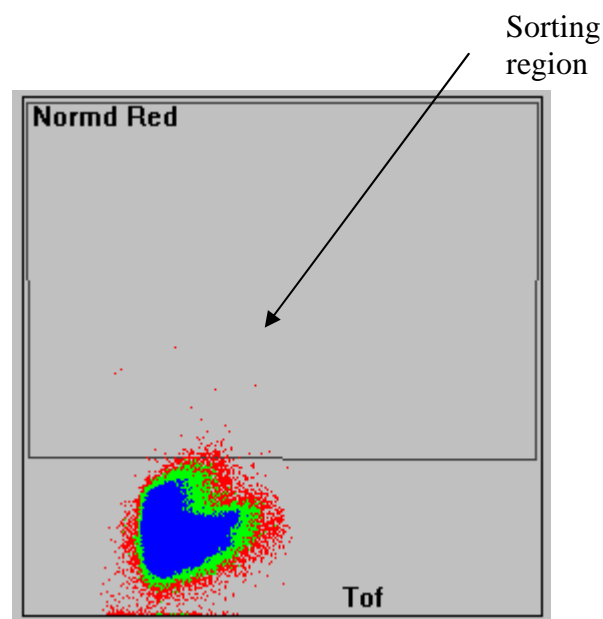

**Figure S4.** Sorting based on normalized fluorescence intensity of individual beads. Sorting region represents the top 0.1 % brightest beads. Average TOF: 592, average Red: 228, average normalized red, 38; Sorted TOF: 695, Sorted Red: 592, Sorted normalized red, 85. Normalized red =  $100 * \text{red} / \text{TOF}$ . The table shows a sample of collected beads with their dispensed locations and corresponding measured values.

Table S3. Lysine Peptide Sequences of TGase substrate

| No |      | Sequence            | TR  | NTR |
|----|------|---------------------|-----|-----|
| 1  | 1B11 | Met-Ile-Lys-Gln-Asp | 230 | 396 |
| 2  | 1B4  | Lys-Asn-Lys-Val-Gly | 283 | 404 |
| 3  | 1B1  | Gly-Thr-Lys-Ala-Ala | 273 | 416 |
| 4  | 1C1  | Leu-Pro-Lys-Met-Tyr | 238 | 428 |
| 5  | 1C6  | Leu-Lys-Lys-Leu-Met | 229 | 400 |
| 6  | 1C7  | Thr-Arg-Lys-Tyr-Pro | 299 | 385 |
| 7  | 1D11 | Asp-Leu-Lys-Met-Arg | 237 | 395 |
| 8  | 1D7  | Met-Arg-Lys-Thr-Asp | 247 | 393 |
| 9  | 1E6  | Arg-Asn-Lys-Val-Pro | 331 | 449 |
| 10 | 1E7  | Arg-Arg-Lys-Tyr-Met | 293 | 398 |
| 11 | 1F9  | Ala-Tyr-Lys-Gln-Ile | 263 | 432 |
| 12 | 1F3  | Val-Thr-Lys-Gly-Gly | 264 | 395 |
| 13 | 1G1  | Ile-Thr-Lys-Trp-Phe | 212 | 421 |
| 14 | 1G5  | Leu-Val-Lys-Gly-Arg | 307 | 404 |
| 15 | 1G7  | Phe-Ala-Lys-Met-Pro | 253 | 395 |
| 16 | 1H6  | His-Arg-Lys-Glu-Gly | 309 | 422 |
| 17 | 2A3  | Tyr-Asn-Lys-Ala-Ala | 294 | 408 |
| 18 | 2A4  | Lys-His-Lys-Lys-Tyr | 328 | 310 |
| 19 | 2A5  | Gly-Lys-Lys-Asp-Tyr | 299 | 406 |
| 20 | 2A9  | Asp-Ala-Lys-Arg-Thr | 313 | 355 |
| 21 | 2A11 | Leu-Phe-Lys-Ile-Gln | 357 | 429 |
| 22 | 2B9  | Phe-Met-Lys-Tyr-Ile | 330 | 412 |
| 23 | 2B4  | Thr-Asp-Lys-Asp-Thr | 306 | 382 |
| 24 | 2B2  | Arg-Phe-Lys-Leu-His | 293 | 398 |
| 25 | 2C1  | Tyr-Ile-Lys-Phe-Pro | 295 | 428 |
| 26 | 2C2  | Gln-Arg-Lys-Gln-Ile | 289 | 451 |
| 27 | 2C3  | Phe-Met-Lys-Arg-Phe | 292 | 434 |
| 28 | 2C6  | Pro-Ser-Lys-Phe-Met | 329 | 447 |
| 29 | 2C7  | Asp-Leu-Lys-His-Arg | 312 | 433 |
| 30 | 2C8  | Val-His-Lys-Val-Asn | 334 | 444 |
| 31 | 2D12 | Gln-Ile-Lys-Gly-Leu | 322 | 428 |
| 32 | 2D10 | Thr-Gly-Lys-Gly-Arg | 317 | 421 |
| 33 | 2D9  | Asn-Ser-Lys-Gly-Phe | 346 | 424 |
| 34 | 2D7  | Arg-Arg-Lys-Ser-Tyr | 302 | 439 |
| 35 | 2D6  | Met-Lys-Lys-Gly-Phe | 461 | 600 |
| 36 | 2D1  | Ala-His-Lys-Ile-Leu | 312 | 398 |
| 37 | 2E1  | Arg-Ser-Lys-Thr-Leu | 318 | 382 |
| 38 | 2E2  | Asn-Ala-Lys-Pro-Phe | 316 | 395 |
| 39 | 2E5  | Ile-Leu-Lys-His-Gly | 306 | 335 |
| 40 | 2E9  | Ile-Met-Lys-Tyr-Asp | 319 | 406 |
| 41 | 2E10 | Val-Ser-Lys-Tyr-Met | 292 | 405 |
| 42 | 2F7  | His-Pro-Lys-Arg-Gln | 328 | 402 |
| 43 | 2F3  | Ser-Val-Lys-Leu-Lys | 314 | 417 |
| 44 | 2G1  | Arg-Asn-Lys-Phe-Asn | 340 | 337 |
| 45 | 2G8  | Ile-Val-Lys-His-Gly | 359 | 448 |
| 46 | 2G10 | Arg-Leu-Lys-His-Ala | 319 | 433 |
| 47 | 2H9  | Gln-Arg-Lys-Ser-Asn | 397 | 477 |
| 48 | 2H7  | Glu-Pro-Lys-Phe-Pro | 347 | 394 |

|    |      |                     |     |     |
|----|------|---------------------|-----|-----|
| 49 | 2H4  | Phe-Gln-Lys-Thr-Pro | 383 | 488 |
| 50 | 3A2  | Phe-Thr-Lys-Phe-Ile | 298 | 445 |
| 51 | 3A4  | Val-Ser-Lys-Lys-Phe | 312 | 452 |
| 52 | 3A5  | Leu-Thr-Lys-Ala-Ser | 303 | 447 |
| 53 | 3A3  | Ile-Met-Lys-Phe-Gly | 304 | 397 |
| 54 | 3A7  | Gln-Ala-Lys-His-Ala | 299 | 428 |
| 55 | 3A8  | Arg-Gly-Lys-Ser-Tyr | 286 | 436 |
| 56 | 3A10 | Met-Val-Lys-Asn-Lys | 302 | 443 |
| 57 | 3A12 | Phe-Val-Lys-Phe-His | 306 | 439 |
| 58 | 3B9  | Asn-Phe-Lys-Met-Pro | 321 | 382 |
| 59 | 5A3  | Met-Pro-Lys-Thr-Thr | 296 | 433 |
| 60 | 5C6  | Phe-Glu-Lys-Gly-His | 305 | 375 |
| 61 | 5C10 | Arg-His-Lys-His-Phe | 309 | 395 |
| 62 | 5C11 | Ala-Phe-Lys-Tyr-His | 365 | 467 |
| 63 | 5C12 | Arg-Val-Lys-Ser-Tyr | 281 | 413 |
| 64 | 5D11 | Ala-Ser-Lys-Arg-Asp | 282 | 400 |
| 65 | 5D8  | Phe-Leu-Lys-Gly-Phe | 313 | 411 |
| 66 | 5D7  | Val-Ile-Lys-Tyr-Gln | 290 | 403 |
| 67 | 5D5  | Leu-Gln-Lys-Ile-Asn | 325 | 430 |
| 68 | 5D3  | Phe-Gln-Lys-Phe-Ile | 271 | 407 |
| 69 | 5D2  | Thr-Gly-Lys-Arg-Phe | 396 | 496 |
| 70 | 5E5  | Ala-Ala-Lys-His-Gly | 300 | 430 |
| 71 | 5E7  | Met-Arg-Lys-Tyr-Asn | 295 | 382 |
| 72 | 5E10 | Gln-Met-Lys-Arg-Leu | 351 | 426 |
| 73 | 5F7  | Tyr-Gln-Lys-His-His | 296 | 368 |
| 74 | 5G2  | Val-Trp-Lys-Gly-Tyr | 309 | 346 |
| 75 | 5G5  | Thr-Arg-Lys-Met-Lys | 321 | 520 |
| 76 | 5H6  | Asn-Phe-Lys-Leu-Arg | 288 | 427 |
| 77 | 5H5  | Pro-Arg-Lys-Val-Phe | 305 | 441 |
| 78 | 4A1  | Ser-Val-Lys-Gln-Ala | 285 | 442 |
| 79 | 4A2  | Asn-Leu-Lys-His-Arg | 255 | 418 |
| 80 | 4A5  | Tyr-Ser-Lys-Pro-Lys | 305 | 421 |
| 81 | 4A11 | Asp-Ile-Lys-Gln-Ile | 265 | 437 |
| 82 | 4B11 | Val-Ser-Lys-Val-Val | 263 | 427 |
| 83 | 4B10 | Tyr-Val-Lys-Ala-Arg | 310 | 411 |
| 84 | 4B7  | Leu-Met-Lys-Gly-Leu | 295 | 414 |
| 85 | 4B2  | Gly-Val-Lys-Ile-Ile | 260 | 434 |
| 86 | 4C1  | Thr-Phe-Lys-Tyr-Leu | 293 | 426 |
| 87 | 4C2  | Phe-Thr-Lys-His-Asn | 259 | 426 |
| 88 | 4C8  | Arg-Gln-Lys-Glu-Phe | 273 | 425 |
| 89 | 4C10 | Met-Arg-Lys-Ile-Asn | 314 | 394 |
| 90 | 4C11 | Asn-Ser-Lys-Ile-Met | 317 | 409 |
| 91 | 4D7  | Thr-Pro-Lys-Arg-Met | 303 | 402 |
| 92 | 4D6  | Tyr-Thr-Lys-Arg-Asn | 301 | 436 |
| 93 | 4D5  | Thr-Ala-Lys-Met-Gly | 254 | 416 |
| 94 | 4E4  | Ile-Lys-Lys-Leu-His | 331 | 373 |
| 95 | 4E6  | Ile-Thr-Lys-Glu-Ile | 321 | 391 |
| 96 | 4E11 | Gly-Tyr-Lys-Arg-Ala | 275 | 411 |
| 97 | 4F4  | Arg-Met-Lys-His-Asp | 336 | 400 |
| 98 | 4G1  | Glu-Lys-Lys-Phe-Gln | 313 | 377 |
| 99 | 4G2  | His-Leu-Lys-Thr-Phe | 308 | 357 |

|     |         |                     |     |     |
|-----|---------|---------------------|-----|-----|
| 100 | 4G3     | Phe-Thr-Lys-His-Thr | 288 | 437 |
| 101 | 4G6     | Phe-Ser-Lys-Thr-Gln | 302 | 396 |
| 102 | 4G12    | Phe-Ala-Lys-Thr-Asn | 252 | 423 |
| 103 | 4H11    | Tyr-Ala-Lys-His-Leu | 273 | 412 |
| 104 | 4H7     | Gln-Tyr-Lys-Val-Leu | 303 | 386 |
| 105 | 4H4     | Val-Asn-Lys-Met-Ala | 362 | 466 |
| 106 | 4H3     | Val-Asn-Lys-Gly-Thr | 301 | 445 |
| 107 | Plate 4 | Arg-Leu-Lys-Leu-Pro |     |     |
| 108 |         | Tyr-Gly-Lys-Ser-Leu |     |     |
| 109 |         | Lys-Ile-Lys-Asn-Gln |     |     |
| 110 |         | Gln-Arg-Lys-Thr-Ala |     |     |
| 111 |         | Tyr-Met-Lys-Tyr-Leu |     |     |
| 112 |         | Arg-His-Lys-Gly-Pro |     |     |
| 113 |         | Arg-Thr-Lys-Gln-Asp |     |     |
| 114 |         | Ser-Val-Lys-Pro-Arg |     |     |
| 115 |         | Asn-Gly-Lys-Arg-Met |     |     |
| 116 |         | His-Gly-Lys-Val-Lys |     |     |
| 117 |         | Leu-Thr-Lys-Tyr-Ala |     |     |
| 118 |         | Gly-Ser-Lys-His-Gly |     |     |
| 119 |         | Met-Thr-Lys-Gln-Met |     |     |
| 120 |         | Met-Gln-Lys-Gln-Arg |     |     |
| 121 | Plate 5 | Phe-Thr-Lys-Arg-Gln |     |     |
| 122 |         | Ser-Gly-Lys-Thr-Glu |     |     |
| 123 |         | Ser-Leu-Lys-Thr-His |     |     |
| 124 |         | Arg-His-Lys-Ile-Val |     |     |
| 125 |         | Asn-Ser-Lys-Arg-Pro |     |     |
| 126 |         | Leu-Ser-Lys-Thr-Val |     |     |
| 127 |         | Thr-Leu-Lys-Val-His |     |     |
| 128 |         | Lys-Leu-Lys-Gly-Tyr |     |     |
| 129 |         | Asn-Ser-Lys-Leu-Arg |     |     |
| 130 |         | Pro-Arg-Lys-Asp-Ala |     |     |
| 131 |         | His-Ser-Lys-Arg-Thr |     |     |
| 132 |         | Pro-Met-Lys-Met-Asn |     |     |
| 133 | Plate 7 | Val-Pro-Lys-Phe-Gln |     |     |
| 134 | 7A2     | Asn-Arg-Lys-His-Phe | 436 | 680 |
| 135 | 7A5     | Glu-Gly-Lys-Lys-Leu | 500 | 608 |
| 136 | 7A11    | Phe-Ser-Lys-Gln-Pro | 504 | 578 |
| 137 | 7B3     | Lys-Tyr-Lys-Tyr-Ser | 441 | 634 |
| 138 | 7B9     | Asn-Pro-Lys-Leu-His | 491 | 590 |
| 139 | 7B10    | Val-Glu-Lys-Ser-Pro | 425 | 690 |
| 140 | 7B11    | Arg-Val-Lys-Gln-Ser | 516 | 586 |
| 141 | 7C1     | Thr-Ala-Lys-Phe-Pro | 441 | 506 |
| 142 | 7C2     | Tyr-Tyr-Lys-Gln-His | 461 | 559 |

|     |      |                     |     |     |
|-----|------|---------------------|-----|-----|
| 143 | 7C5  | Thr-Leu-Lys-Met-Ile | 497 | 580 |
| 144 | 7C8  | Tyr-Ser-Lys-Lys-Asp | 467 | 687 |
| 145 | 7C9  | Ile-Lys-Lys-Ser-Ser | 520 | 677 |
| 146 | 7D4  | Val-Leu-Lys-His-Pro | 475 | 560 |
| 147 | 7D7  | Arg-Val-Lys-Thr-Phe | 448 | 683 |
| 148 | 7E4  | Phe-Lys-Lys-Lys-Glu | 273 | 487 |
| 149 | 7E6  | Asn-Phe-Lys-Met-Phe | 471 | 613 |
| 150 | 7E12 | Ile-Ser-Lys-Tyr-Ser | 529 | 655 |
| 151 | 7F5  | Ala-Thr-Lys-Gln-Leu | 512 | 566 |
| 152 | 7F8  | Asn-Gly-Lys-Ala-Arg | 264 | 492 |
| 153 | 7F11 | Phe-Arg-Lys-Leu-Pro | 431 | 544 |
| 154 | 7G1  | Asn-Ile-Lys-Ser-His | 489 | 541 |
| 155 | 7G10 | Tyr-Leu-Lys-Gln-Gly | 524 | 697 |
| 156 | 7G12 | Val-Lys-Lys-Tyr-Ser | 426 | 656 |
| 157 | 7H1  | Gly-Phe-Lys-Ile-Asp | 460 | 491 |
| 158 | 7H4  | Val-Leu-Lys-Tyr-Pro | 698 | 739 |
| 159 | 7H7  | His-Phe-Lys-Ala-Pro | 427 | 550 |
| 160 | 7H8  | Val-His-Lys-Phe-Tyr | 691 | 738 |
| 161 | 7H10 | Ala-Pro-Lys-Pro-Arg | 402 | 653 |
| 162 | 7H11 | Lys-Thr-Lys-Thr-Gly | 498 | 556 |
| 163 | 8A2  | Gly-Tyr-Lys-His-Arg | 405 | 684 |
| 164 | 8A5  | Leu-Thr-Lys-Tyr-Leu | 295 | 595 |
| 165 | 8A9  | Arg-Tyr-Lys-Gln-Thr | 279 | 554 |
| 166 | 8A12 | Asp-Phe-Lys-His-Leu | 502 | 668 |
| 167 | 8B12 | Gln-Ile-Lys-Arg-Phe | 592 | 755 |
| 168 | 8B11 | Ser-Pro-Lys-Phe-Ile | 386 | 603 |
| 169 | 8B2  | Arg-Ile-Lys-Thr-Asp | 499 | 600 |
| 170 | 8B1  | Val-Val-Lys-Gly-Gly | 525 | 637 |
| 171 | 8C1  | Arg-Met-Lys-Pro-Thr | 469 | 598 |
| 172 | 8C7  | Arg-Arg-Lys-Gln-Phe | 322 | 592 |
| 173 | 8C12 | Phe-Ile-Lys-Ser-Glu | 567 | 738 |
| 174 | 8D4  | Arg-Leu-Lys-Asp-Gln | 322 | 610 |
| 175 | 8E5  | Glu-Phe-Lys-Arg-Gln | 327 | 576 |
| 176 | 8E11 | Val-Arg-Lys-Ile-Ala | 399 | 616 |
| 177 | 8F12 | Tyr-Val-Lys-Gln-Phe | 448 | 629 |
| 178 | 8F6  | Ile-Val-Lys-Gly-Asp | 461 | 588 |
| 179 | 8F5  | Val-Ile-Lys-Trp-His | 314 | 654 |
| 180 | 8G7  | Arg-Ser-Lys-His-Asp | 412 | 606 |
| 181 | 8G9  | Val-Ile-Lys-Arg-Val | 403 | 600 |
| 182 | 8H9  | Asn-Leu-Lys-Arg-Gln | 341 | 592 |
| 183 | 9A1  | Ser-Gly-Lys-Arg-Phe | 464 | 617 |
| 184 | 9A2  | Asp-Thr-Lys-Leu-Ile | 422 | 651 |
| 185 | 9A8  | Gly-Ser-Lys-Pro-Gly | 495 | 695 |
| 186 | 9A11 | Tyr-Tyr-Lys-His-Leu | 467 | 671 |
| 187 | 9B10 | Glu-Thr-Lys-Val-Pro | 414 | 681 |
| 188 | 9B7  | Pro-Tyr-Lys-Phe-Leu | 548 | 745 |
| 189 | 9B5  | Tyr-Tyr-Lys-His-Leu | 419 | 680 |
| 190 | 9C3  | Thr-Val-Lys-Leu-Arg | 396 | 688 |
| 191 | 9C10 | Gly-Leu-Lys-Phe-Ala | 428 | 660 |
| 192 | 9C12 | Tyr-Phe-Lys-Val-His | 378 | 656 |
| 193 | 9D8  | Arg-Thr-Lys-Ile-Val | 393 | 692 |

|     |       |                     |     |      |
|-----|-------|---------------------|-----|------|
| 194 | 9D6   | Arg-Val-Lys-Thr-Lys | 433 | 677  |
| 195 | 9D5   | Tyr-Asn-Lys-Ser-His | 579 | 762  |
| 196 | 9D3   | Phe-Leu-Lys-Leu-Ala | 412 | 678  |
| 197 | 9E4   | Lys-Phe-Lys-Ala-Ala | 437 | 635  |
| 198 | 9F1   | Ala-Tyr-Lys-Lys-Phe | 446 | 648  |
| 199 | 9F2   | Arg-Ile-Lys-Ser-Ala | 504 | 724  |
| 200 | 9F9   | Gln-Val-Lys-Tyr-His | 474 | 581  |
| 201 | 9G11  | Glu-Phe-Lys-Tyr-Lys | 352 | 579  |
| 202 | 9G10  | His-Thr-Lys-Leu-His | 425 | 670  |
| 203 | 9G9   | Ile-Lys-Lys-Gln-Tyr | 451 | 705  |
| 204 | 9G6   | Val-Pro-Lys-Asn-Gln | 527 | 708  |
| 205 | 9G4   | Thr-Arg-Lys-Val-Ala | 429 | 670  |
| 206 | 9G2   | Thr-Asn-Lys-Gln-Arg | 491 | 563  |
| 207 | 9H5   | Tyr-Ala-Lys-Arg-Ala | 391 | 660  |
| 208 | 9H6   | Val-Arg-Lys-Pro-Phe | 415 | 674  |
| 209 | 9H12  | Glu-Lys-Lys-Tyr-Thr | 441 | 656  |
| 210 |       | Gln-Thr-Lys-Met-Gly |     |      |
| 211 | 10A4  | Val-Val-Lys-Arg-Glu | 438 | 684  |
| 212 | 10A5  | Lys-Thr-Lys-Phe-His | 509 | 699  |
| 213 | 10B12 | Pro-Pro-Lys-Gly-Phe |     |      |
| 214 | 10B8  | Ile-Phe-Lys-Gln-His | 477 | 557  |
| 215 | 10C1  | Arg-Pro-Lys-Thr-Thr | 508 | 722  |
| 216 | 10C3  | Phe-His-Lys-Arg-Val | 462 | 621  |
| 217 | 10C7  | Val-Ser-Lys-Gly-Tyr | 621 | 776  |
| 218 | 10C10 | Leu-Phe-Lys-Lys-Val |     |      |
| 219 | 10D2  | Gln-Ala-Lys-Arg-Ile | 455 | 729  |
| 220 | 10D4  | Asn-Val-Lys-Met-Gln | 497 | 668  |
| 221 | 10E3  | Pro-Val-Lys-Met-Tyr | 471 | 727  |
| 222 | 10F3  | Phe-Phe-Lys-Asn-Leu | 473 | 610  |
| 223 | 10G2  | Gln-Lys-Lys-Ala-Leu | 382 | 682  |
| 224 | 10G6  | Lys-Pro-Lys-Ala-Arg | 967 | 1246 |
| 225 | 10G7  | Asn-Arg-Lys-Asn-Ile | 537 | 738  |
| 226 | 10G12 | Ile-Ile-Lys-Gly-Asp |     |      |
| 227 | 10H11 | Ala-Ala-Lys-Phe-Met |     |      |
| 228 | 10H3  | His-His-Lys-Lys-Ala | 282 | 511  |
| 229 | 10H2  | Val-Gly-Lys-Met-Tyr | 463 | 715  |
| 230 | 11A3  | Asn-Met-Lys-Lys-Ser | 422 | 723  |
| 231 | 11A4  | Leu-Tyr-Lys-Ile-Asn | 433 | 712  |
| 232 | 11A10 | Met-Tyr-Lys-His-Met |     |      |
| 233 | 11A11 | Ala-Tyr-Lys-Val-Thr |     |      |
| 234 | 11A12 | Gly-Tyr-Lys-His-Pro |     |      |
| 235 | 11B11 | Tyr-Lys-Lys-Ala-Gly |     |      |
| 236 | 11B10 | Val-Lys-Lys-His-Asn |     |      |
| 237 | 11B9  | Arg-Thr-Lys-Ile-Met |     |      |
| 238 | 11B6  | Met-Gln-Lys-His-Phe | 449 | 624  |
| 239 | 11B5  | Ser-Val-Lys-Gln-Met | 389 | 760  |
| 240 | 11C5  | Thr-Arg-Lys-Ile-Gly | 475 | 660  |
| 241 | 11C6  | Val-Tyr-Lys-Gln-Ile | 480 | 594  |
| 242 | 11C7  | Ala-Gly-Lys-Ser-Tyr | 259 | 506  |
| 243 | 11C9  | Lys-Thr-Lys-Met-Phe | 503 | 629  |
| 244 | 11C12 | Asn-Phe-Lys-Val-Tyr |     |      |

|     |       |                     |     |      |
|-----|-------|---------------------|-----|------|
| 245 | 11D9  | Gln-Ser-Lys-Tyr-Phe | 445 | 592  |
| 246 | 11D8  | Val-Arg-Lys-Ser-Asp | 539 | 642  |
| 247 | 11D4  | Leu-Ala-Lys-Pro-Leu | 403 | 637  |
| 248 | 11D2  | Arg-Thr-Lys-Pro-Arg | 424 | 688  |
| 249 | 11D1  | Met-Asp-Lys-Arg-His | 456 | 679  |
| 250 | 11E6  | Asp-Lys-Lys-Thr-Lys | 581 | 757  |
| 251 | 11F10 | Phe-His-Lys-Phe-Ala |     |      |
| 252 | 11F4  | Arg-Val-Lys-His-Ala | 502 | 609  |
| 253 | 11F3  | Glu-Ser-Lys-Ile-Tyr | 641 | 880  |
| 254 | 11F2  | Val-Lys-Lys-Gln-Ala | 573 | 884  |
| 255 |       | His-Ser-Lys-Thr-His |     |      |
| 256 | 11G3  | Leu-Gly-Lys-Tyr-Ser | 551 | 669  |
| 257 | 11G7  | Met-Glu-Lys-Pro-Arg | 577 | 714  |
| 258 | 11G10 | Thr-Arg-Lys-Gln-Tyr |     |      |
| 259 | 11G11 | Ser-Glu-Lys-Arg-Gly |     |      |
| 260 | 11H11 | Ala-Arg-Lys-Val-Ser |     |      |
| 261 | 11H8  | Asn-Gly-Lys-Gly-Tyr | 603 | 819  |
| 262 | 11H7  | Gly-Trp-Lys-Ser-Leu | 224 | 438  |
| 263 | 11H5  | Pro-Val-Lys-Val-Arg | 520 | 747  |
| 264 | 11H2  | Phe-Gln-Lys-Arg-Phe | 362 | 696  |
| 265 | 12A3  | Arg-Pro-Lys-Asp-His | 512 | 800  |
| 266 | 12A6  | Val-Arg-Lys-Pro-Asp | 622 | 770  |
| 267 | 12A7  | Ala-Leu-Lys-Phe-Tyr | 527 | 834  |
| 268 | 12A12 | Val-Gln-Lys-Pro-Gly |     |      |
| 269 | 12B10 | Phe-Tyr-Lys-His-Pro |     |      |
| 270 | 12B7  | Asn-Pro-Lys-Phe-Gln | 679 | 738  |
| 271 | 12B5  | Leu-Tyr-Lys-Met-Met | 422 | 723  |
| 271 | 12B3  | Gly-Leu-Lys-Pro-Thr | 340 | 567  |
| 273 | 12B1  | Ala-Lys-Lys-Leu-Lys | 680 | 1024 |
| 274 | 12D10 | Ala-Gly-Lys-Gly-Ala |     |      |
| 275 | 12D8  | Leu-Phe-Lys-Glu-Pro |     |      |
| 276 |       | Ala-Arg-Lys-Thr-Arg |     |      |
| 277 | 12D7  | Phe-Leu-Lys-Asn-Met | 650 | 903  |
| 278 | 12D3  | Glu-Asn-Lys-Lys-Met | 692 | 883  |
| 279 | 12D2  | Gln-Arg-Lys-Ile-Ile | 609 | 674  |
| 280 | 12E1  | Asp-Val-Lys-Arg-Ile | 701 | 835  |
| 281 | 12E6  | Leu-Tyr-Lys-Asn-Phe | 599 | 841  |
| 282 | 12E7  | Val-Trp-Lys-Val-Ser | 754 | 951  |
| 283 | 12E10 | Asn-Phe-Lys-His-Tyr |     |      |
| 284 | 12F2  | Gly-Ile-Lys-Val-Glu | 643 | 699  |
| 285 | 12F5  | Val-Gly-Lys-Ile-Phe | 717 | 887  |
| 286 | 12F6  | Ser-Phe-Lys-Thr-Phe | 638 | 831  |
| 287 | 12F7  | Val-Arg-Lys-Gly-Gly | 625 | 831  |
| 288 | 13A7  | Gln-Tyr-Lys-Tyr-Lys | 569 | 837  |
| 289 | 13A8  | Arg-Tyr-Lys-Val-His | 628 | 863  |
| 290 | 13A12 | Ser-Lys-Lys-Ala-Lys |     |      |
| 291 | 13B12 | Ala-Phe-Lys-Val-Lys |     |      |
| 292 | 13B8  | Thr-Ser-Lys-Thr-Phe | 637 | 653  |
| 293 | 13B6  | Thr-Tyr-Lys-Tyr-Thr | 494 | 870  |
| 294 | 13B3  | Asn-Asn-Lys-Arg-Ile | 526 | 843  |
| 295 | 13C5  | Ala-Ser-Lys-Thr-Gln | 574 | 920  |

|     |        |                     |     |      |
|-----|--------|---------------------|-----|------|
| 296 | 13D8   | Phe-Arg-Lys-Val-Met | 654 | 861  |
| 297 | 13D6   | Gly-Arg-Lys-Ile-Ser | 697 | 880  |
| 298 | 13E2   | Phe-Phe-Lys-Asn-Met | 631 | 822  |
| 299 | 13E3   | Ile-Arg-Lys-Gly-Arg | 590 | 819  |
| 300 | 13E5   | Ser-Phe-Lys-Arg-Phe | 632 | 806  |
| 301 | 13E6   | Ile-Phe-Lys-Gly-Gly | 622 | 854  |
| 302 | 13E7   | Tyr-Val-Lys-Phe-Thr | 611 | 878  |
| 303 | 13E9   | Ile-Arg-Lys-Gly-Met | 617 | 820  |
| 304 | 13E12  | Phe-Arg-Lys-Val-Phe |     |      |
| 305 | 13F7   | Val-Trp-Lys-Ser-Arg | 626 | 775  |
| 306 | 13F4   | Pro-Tyr-Lys-His-Met | 649 | 863  |
| 307 | 13F1   | Gly-Ile-Lys-Phe-Tyr | 863 | 1112 |
| 308 | 13G9   | Phe-His-Lys-Gly-Phe | 632 | 832  |
| 309 | 13G12  | Tyr-Leu-Lys-Asn-Ser |     |      |
| 310 | 13H12  | Ala-Arg-Lys-Val-Asn |     |      |
| 311 | 13H7   | Gly-Val-Lys-Leu-Phe | 636 | 864  |
| 312 | 13H6   | Gly-Ile-Lys-Gln-Gln | 587 | 781  |
| 313 | 13H5   | Val-Ser-Lys-Asn-Tyr | 622 | 810  |
| 314 | 13H2   | Tyr-Arg-Lys-Thr-Met | 608 | 809  |
| 315 | pl4_42 | Thr-Ser-Lys-Lys-Ser |     |      |
| 316 | 43     | Phe-Gly-Lys-His-Ile |     |      |
| 317 | 44     | Val-Ala-Lys-Met-Lys |     |      |
| 318 | 45     | His-Trp-Lys-Pro-Ile |     |      |
| 319 | 46     | Val-Ala-Lys-Tyr-Met |     |      |
| 320 | 48     | Glu-Lys-Lys-Pro-His |     |      |
| 321 | 52     | Val-Phe-Lys-Ala-Ser |     |      |
| 322 | 54     | Ile-Gly-Lys-Lys-His |     |      |
| 323 | 55     | Val-Ile-Lys-Arg-His |     |      |
| 324 | 56     | Ser-Gly-Lys-Arg-Asp |     |      |
| 325 | 57     | Gly-Pro-Lys-Lys-Thr |     |      |
| 326 | 58     | Lys-Val-Lys-Gln-Arg |     |      |
| 327 | 15A11  | Ile-Phe-Lys-Gly-Phe |     |      |
| 328 | 15B11  | Leu-Ser-Lys-Phe-Phe |     |      |
| 329 | 15C3   | Ala-His-Lys-Gln-Met | 679 | 980  |
| 330 | 15C9   | Ile-Val-Lys-Lys-Gln | 669 | 820  |
| 331 | 15C10  | Met-Leu-Lys-Lys-Ala |     |      |
| 332 | 15D9   | Tyr-Ser-Lys-Leu-Arg | 636 | 850  |
| 333 | 15D5   | Arg-Thr-Lys-Lys-Glu | 622 | 830  |
| 334 | 15D4   | Ile-Ala-Lys-Asn-Arg | 589 | 860  |
| 335 | 15D1   | Met-Tyr-Lys-Leu-Gln | 618 | 810  |
| 336 | 15E2   | Phe-Ser-Lys-Gly-Met | 681 | 830  |
| 337 | 15E4   | Ser-Met-Lys-Leu-His | 636 | 810  |
| 338 | 15E7   | Leu-Val-Lys-Arg-Glu | 655 | 860  |
| 339 | 15E8   | Gly-Val-Lys-Ala-Asn | 652 | 820  |
| 340 | 15F9   | Asn-Phe-Lys-Val-Arg | 688 | 880  |
| 341 | 15F4   | His-Val-Lys-Leu-Arg | 751 | 800  |
| 342 | 15F1   | His-Lys-Lys-Asn-His | 745 | 940  |
| 343 | 15G4   | Met-Thr-Lys-Phe-Asn | 624 | 890  |
| 344 |        | Gly-Ser-Lys-His-Ala |     |      |
| 345 |        | Ser-Ile-Lys-Lys-Pro |     |      |

TR: global total red fluorescence; NTR: normalized global total red fluorescence.

# Supporting Information for Glutamine Peptide Library

## Experimental Section

Described below is the synthesis, two-stage screening, MALDI-TOF MS sequencing and enzymatic study of an encoded glutamine hexapeptide library with the general sequence of  $X_1X_2QQX_5X_6$ .

## Materials and Methods

### Materials.

PEGA amine was purchased from Polymer Laboratories, Inc. (Amherst, MA). Fmoc-photocleavable linker (Fmoc-PCL), Fmoc-amino acids, Boc-amino acids, 1, 5-diaminopentane trityl resin, Fmoc-PEG600 acid, Fmoc-Wang resin and 2-chlorotrityl resin were obtained from Novabiochem (La Jolla, CA). Fmoc- $\epsilon$ -Ahx and Boc- $\epsilon$ -Ahx were purchased from Advanced Chemtech (Louisville, KY). MULTIBLOCK manual library synthesizer was purchased from CSPA Pharmaceuticals (CA). Desthiobiotin, dansyl-cadaverine, Substance P peptide was obtained from Sigma (St. Louis, MO). SPHERO<sup>TM</sup> streptavidin-magnetic particles were purchased from Spherotech Inc. (Libertyville, IL). Rhodamine B-streptavidin was purchased from Molecular Probes (Eugene, OR).

### Methods

**Library Synthesis.** An overview of the synthesis of the peptides on the beads is outlined in **Scheme S2**. PEGA amine resin (300-500  $\mu$ m, 1 g, 0.2 mmol, 770,000-1,270,000 beads) was washed with methanol (MeOH) and *N*-methyl-2-pyrrolidinone (NMP), three times each. Fmoc-photocleavable linker (Fmoc-PCL) (312 mg, 0.6 mmol, 3 equiv), benzotriazole-1-yl-oxy-tris(dimethylamino)-phosphoniumhexafluorophosphate

(BOP) (265 mg, 0.6 mmol), and *N*-hydroxybenzotriazole (HOBt) (92 mg, 0.6 mmol) were dissolved in NMP (7 mL), followed by addition of diisopropylethylamine (DIEA) (105 mL, 0.6 mmol). After 10 min at room temperature with occasional stirring, the solution was added into the resin and incubated overnight with rocking. Completion of the coupling reaction was confirmed by a negative Kaiser test. After removal of Fmoc in 20% piperidine in NMP for 20 min, NH<sub>2</sub>-Pro-Tyr(tBu)-Phe-Arg(Pbf)-Val-PCL-PEGA (MSS-PCL-PEGA) resin was synthesized by Fmoc solid-phase peptide synthesis strategy. Each coupling reaction was performed for 30 min with a 10-min pre-activation of five equivalents of Fmoc-amino acid-BOP-HOBt-DIEA (1:1:1:1) at room temperature. Fmoc was removed by 20% piperidine in NMP for 20 min. After Fmoc removal, Fmoc- $\epsilon$ -Ahx/Boc- $\epsilon$ -Ahx (9:1, 318 mg/23.1 mg) were coupled to the resin using the above coupling protocol.

The resin was suspended in methanol and dispensed evenly into 19 syringe reaction vessels of a MULTIBLOCK manual library synthesizer (CSPS Pharmaceuticals, CA). The resin was washed with methanol and NMP, and Fmoc was removed. For the synthesis of position X<sub>6</sub>, each Fmoc amino acid (0.18 mmol, 20 equiv) (totaling 19, cysteine not included) and its counterpart Boc-amino acid (0.02 mmol), or Boc-Lys(Boc)-OH (0.01 mmol) and Boc-Lys(Ac)-OH (0.01 mmol) as well as Boc-Leu-OH (0.01 mmol) and Boc- $\gamma$ -Abu-OH (0.01 mmol) for the binary tag of Lys and Leu residues, were dissolved in NMP (0.5 mL), mixed with BOP (0.2 mmol) and HOBt (0.2 mmol) in NMP (0.5 mL), and followed by addition of DIEA (0.2 mmol) in NMP (0.5 mL). After 10 min, each solution was added to one syringe reaction vessel (totaling 19) and shaken for 2 h. The randomization step was carried out using the apparatus in methanol by

mixing the resins from all 19 syringe vessels and redistributing them uniformly into 19 syringe vessels. For the syntheses of positions X<sub>1</sub>, X<sub>2</sub>, and X<sub>5</sub>, all above procedures for the synthesis of position X<sub>6</sub> were repeated. For the synthesis of two glutamine residues, the procedures were the same as above except Fmoc-glutamine-OH was used and reaction time was 3 h for all reaction vessels. The randomization step was omitted.

After removal of N-terminal Fmoc, the peptide resins were pooled and treated with trifluoroacetic acid (TFA)-triisopropylsilane (TIS)-H<sub>2</sub>O (95:2.5:2.5) for 3 h and followed by treatment with TFA-thioanisole-H<sub>2</sub>O-EDT-TIS (86.5:5:5:2.5:1) for 24 h. The beads were washed with NMP, dichloromethane (DCM), MeOH, and acetonitrile (ACN)-H<sub>2</sub>O (1:1). Some beads were randomly selected for MALDI-TOF MS analysis.

**Synthesis of Desthiobiotin-PEG600-Cadaverine (DPC).** The solid-phase synthesis of this conjugate was carried out manually on a 1,5-diaminopentane trityl resin (0.87 mmol/g) (0.3 g, 0.87 mmol/g, 0.26 mmol) by Fmoc strategy. Desthiobiotin and Fmoc-PEG600 acid were treated as Fmoc-amino acid. Fmoc-PEG600-OH (291 mg, 0.347 mmol), BOP (154 mg, 0.347 mmol), and HOBt (53 mg, 0.347 mmol) were dissolved in DCM-NMP (1:1) (4 mL), and followed by addition of DIEA (60  $\mu$ L, 0.347 mmol). After 10 min, the solution was added to a reaction vessel containing 0.3 g of 1,5-diaminopentane trityl resin (0.26 mmol) and rocked overnight, followed by washing with NMP, DCM, and NMP again, three times each. Fmoc was removed by treatment with 20% piperidine in NMP for 20 min and washed with NMP four times. Desthiobiotin (167 mg, 0.78 mmol) and BOP (344 mg, 0.78 mmol) were dissolved in DCM (4 mL) and NMP (2 mL), followed by addition of DIEA (136  $\mu$ L). The solution was added to the resin and rocked for 60 min, followed by washing with NMP, DCM, and 2-propanol

(IPA), three times each. Then, the resin was treated with 20% TFA and 2.5% TIS in DCM (50 mL) for 15 min four times. The crude product was obtained by concentration of the TFA solution and addition of diethyl ether. The crude product was purified using a semi-preparative C-18 RP-HPLC column (250 × 22 mm, 10 μm, Vydac) with an acetonitrile gradient of 14%-38% in 120 min. The fractions containing the product were pooled and lyophilized. ESI-MS (LCQ-LC-MS system, Finnigan, Thermoquest, CA) of the purified product gave peaks at  $m/z$  898.4.

**On-Resin Enzymatic Reaction.** The library beads were washed with glacial acetic acid, H<sub>2</sub>O, and 0.1 M MOPS buffer (pH 7.2), three times each and drained. Ten milliliters of 0.1 M MOPS buffer solution (pH 7.2) containing 20 mM CaCl<sub>2</sub>, 4 mM DPC were added to the resin bead and rocked for 10 min, followed by addition of 10 mL of 0.1 M MOPS buffer solution (pH 7.2) containing 2 mM EDTA, 20 mM DTT, and tTG (6 units). The reaction mixture was rocked at room temperature for 30 min, and then drained. The beads were washed with 0.1 M MOPS buffer solution (pH 7.2), H<sub>2</sub>O, 0.1% TWEEN-20 in H<sub>2</sub>O, H<sub>2</sub>O, PBS (pH 7.2), three times each.

**Two-Stage Library Screening.** A diagram demonstrating the screening methods is shown in Scheme S3. The beads were washed with PBS (pH 7.2) three times and drained. PBS (pH 7.2) (20 mL) was added to the resin beads. SPHERO™ streptavidin-magnetic particles (2 mL) were added to the beads, and the mixture was incubated at room temperature for 2 h. PBS (pH 7.2) containing 0.5% BSA was added to dilute the resin beads and separated using a magnet ×3 times.

The magnetically selected beads (ca. 1 mL) were treated with 50 mM biotin in PBS (pH 7.2) for 2 h, and washed with H<sub>2</sub>O, NMP, H<sub>2</sub>O, PBS (pH 7.2), 0.3% BSA in

PBS (pH 7.2), 0.1% Tween-20 in H<sub>2</sub>O, H<sub>2</sub>O, PBS (pH 7.2), three times each and drained. Then, 0.3% BSA and 0.1% Tween-20 in PBS (pH 7.2) (3 mL) were added to the beads, and incubated after addition of 0.1 mg of rhodamine B-streptavidin at room temperature for 30 min. The beads were washed with PBS (pH 7.2), 0.3% BSA in PBS, and 0.1% Tween-20 in PBS, three times each. The beads were diluted with 0.1% Tween-20 and 0.3% BSA in PBS, and selected under a fluorescence microscope using a micropipette.

**MALDI-TOF MS Analysis of Single Beads.** Individual beads selected according to their fluorescence intensity were washed with H<sub>2</sub>O. MALDI-TOF mass spectra were obtained by using the following procedures: (1) Prepare the matrix solution by dissolving 10 mg of  $\alpha$ -cyano-4-hydroxycinnamic acid (CHCA) in 100  $\mu$ L of 3% TFA in H<sub>2</sub>O, 300  $\mu$ L of H<sub>2</sub>O, and 600  $\mu$ L of acetonitrile. (2) Irradiate a single bead with 2  $\mu$ L of ACN-H<sub>2</sub>O (1:1) added in the MALDI-TOF sample plate for 15 min at UV 365 nm. (3) Apply 1  $\mu$ L of the matrix solution onto the sample plate with the bead on the sample plate, and air-dry the liquid. (4) Perform MALDI-TOF MS analysis on a Voyager-DE<sup>TM</sup>Pro mass spectrometer (PerSpective Biosystems). The amino acid sequences of the 267 selected glutamine peptides are shown in Table S4.

**MALDI-TOF PSD MS Evaluation.** MALDI-TOF PSD MS analysis of the product peaks revealed that the enzyme reacted with the first fixed Gln for most of the peptides. Examples of the MALDI-TOF PSD mass spectra are shown in **Figure S8**. The bold Gln in **Table 2** indicate the residues that were involved in the tTG cross-linking as determined by PSD. Peptides 5 and 10 also involved the Gln in the X<sub>2</sub> position. Six peptides had both fixed Gln residues involved in the tTG reaction. The cross-linking was

found to include two Gln if two different fragment peaks containing DC were identifiable in the spectra (**Figure S8B**).

### **Additional Discussion of Glutamine Peptide Library**

This library has peptides with a general sequence of  $X_1X_2QQX_5X_6$ , which was designed anticipating that an increase in the numbers of Gln translated into an increase in reactivity.<sup>1, 2</sup> In addition, there are a number of known substrates where the reactive Gln is usually found adjacent to another Gln.<sup>3-5</sup>

After the DPC had been conjugated to the reactive peptides and the on-bead enzymatic reactions were quenched, the beads were screened first by magnetic separation and then by fluorescence intensity. The first stage of screening was accomplished using streptavidin-conjugated magnetic particles. The beads with the most magnetic particles, which corresponded to the beads with the most reactive peptides, were isolated magnetically. The second screening was completed by first using biotin to wash out the magnetic streptavidin and then conjugating the beads with rhodamine-labeled streptavidin. The brightest beads (267 total) were selected visually using a fluorescent microscope, which has its associated subjectivity.

In the present study, the first invariant Gln was usually involved in the isopeptide bond formation (see **Table 2**). This is similar to observations of Substance P by Pastor et al. where the first Gln retained 94% of the reactivity when the second was replaced by Asn.<sup>3</sup> Parameswaran et al. suggested that in the AEQQIV peptide, the first Gln was the primary acyl donor in the tTG reaction because Boc-QIV was unreactive<sup>6</sup>. This was also observed in half of the peptides containing 2 adjacent Gln in a phage-display library.<sup>7</sup> In six of the peptides, both invariant Gln were reactive and in two others, the Gln in  $X_2$

served as a second reactive Gln. This is likely due to other features of the peptide that facilitate either binding to the enzyme and/or reaction with tTG.

Of the 267 peptides identified in the library, peptides with five or six glutamines were not found. There were 33 peptides that contained 3 or 4 contiguous Gln. Ten of these peptides were synthesized and their enzyme kinetic values were evaluated (one was insoluble). While a general examination of their kinetic values do not indicate superior properties over the peptides containing 2 Gln, individual comparisons demonstrate that a substitution of Gln at X<sub>2</sub> or X<sub>5</sub> improves the K<sub>m</sub>. (Compare peptides nos 5 and 6, nos 7 and 11 and nos 10 and 13). This is congruous with studies by Gorman and Folk which demonstrated that an increase from 1 to 2 Gln lead to a decrease in K<sub>m</sub><sup>2</sup>. In previously reported studies, an increase in number of contiguous Gln (1, 3, 5, 8 and 12) lead to an increase in the rate and quantity of amine donor incorporated<sup>1</sup>. However, the differences in the amount of contiguous Gln between peptides (3 and 4) in this study have not been observed.

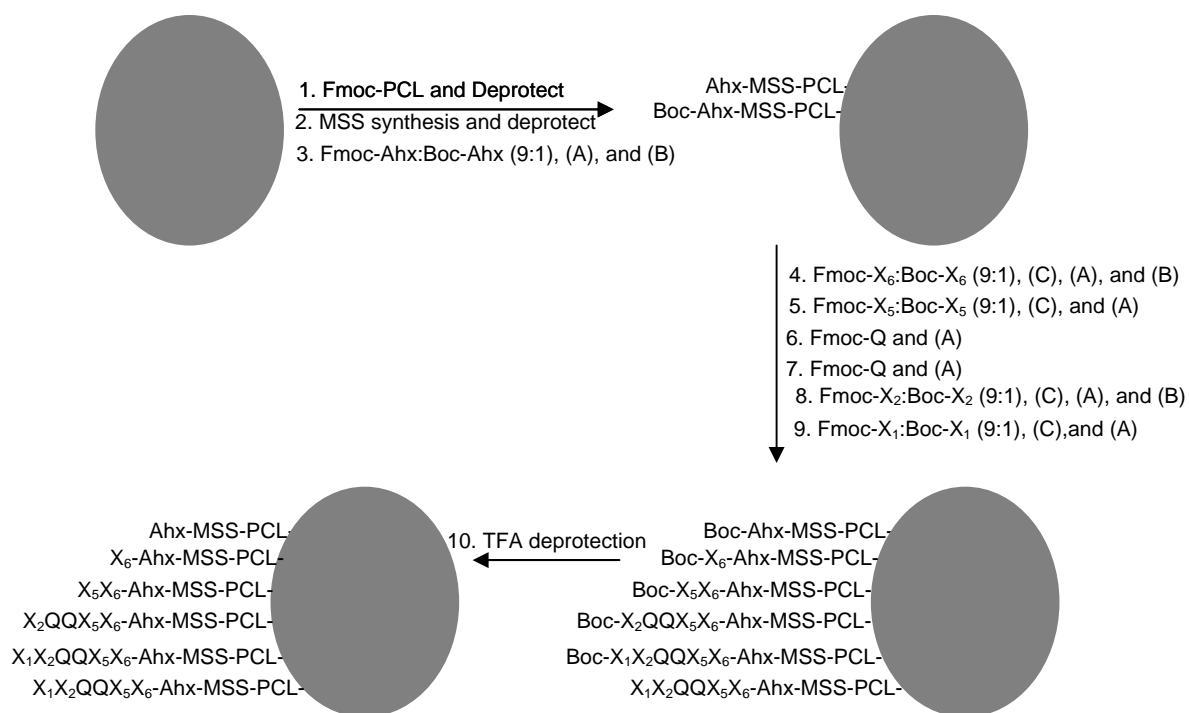

**Scheme S2.** Overview of the glutamine library synthesis. (A) Deprotect Fmoc using piperidine. (B) Split the resin into 19 syringes and perform amino acid coupling. (C) Combine resin. Amino acid (Fmoc-X:Boc-X, 9:1) coupling was performed using BOP and DIPEA. When Lys and Leu are coupled, the Fmoc-X:Boc-X:Secondary tag ratio was 9:0.5:0.5.

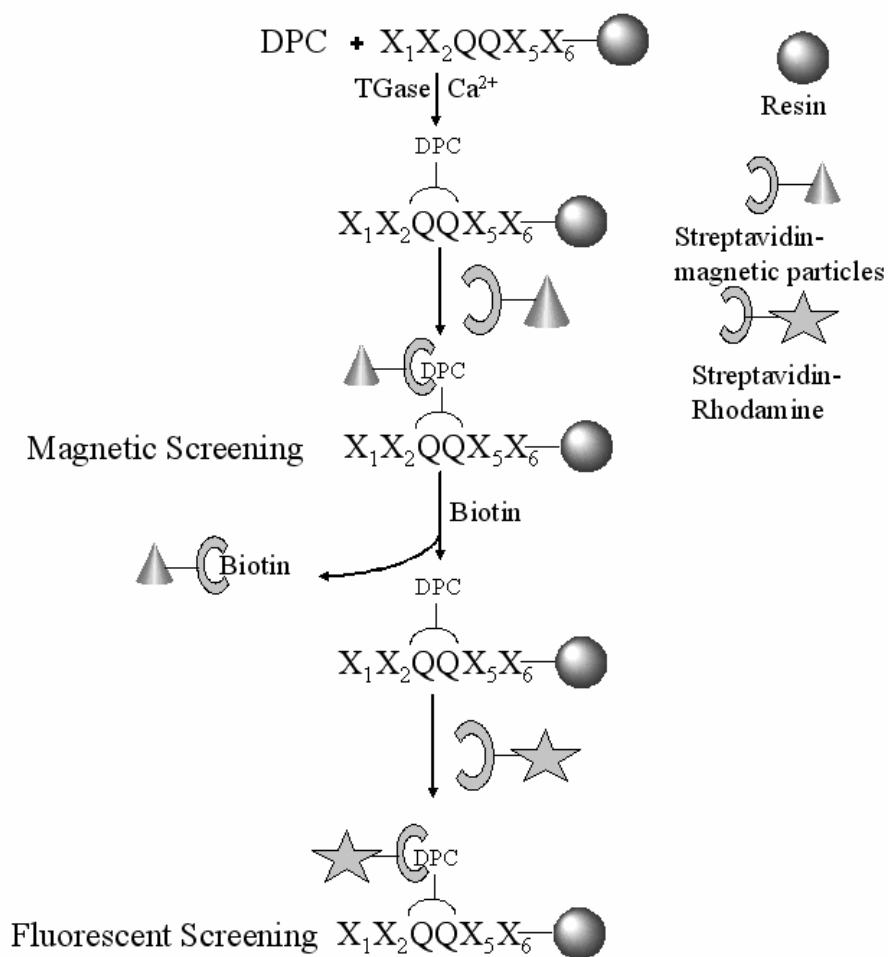

**Scheme S3.** Summary of the two-stage screening of glutamine substrate peptide library.

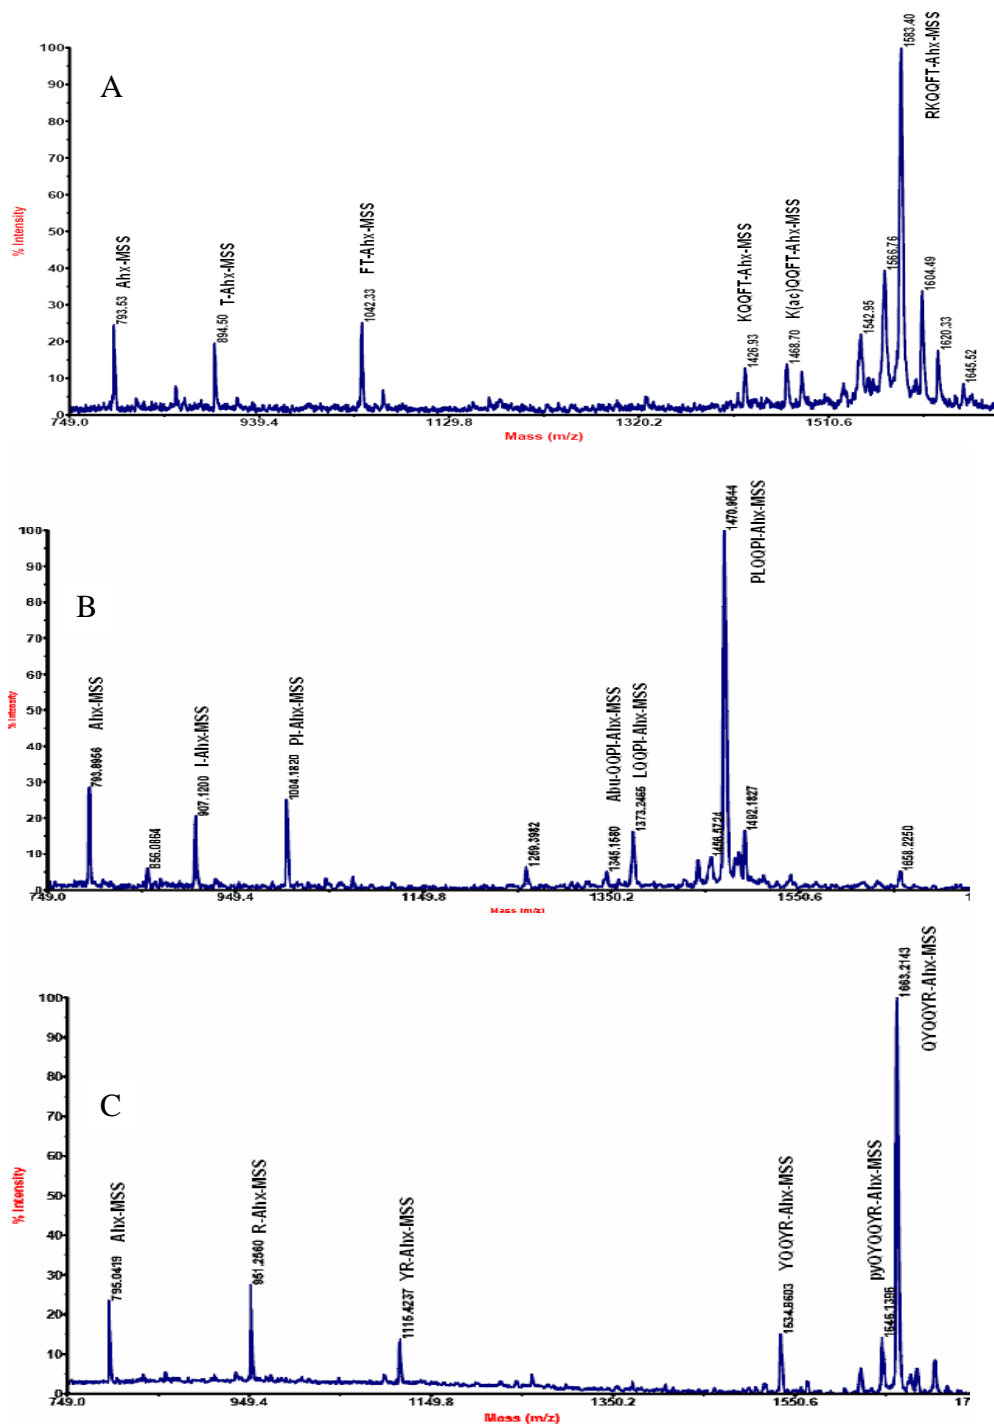

**Figure S5.** MALDI-TOF spectra of peptide sequence on the resin bead. Each peak in the spectra represents a peptide tag. The difference between adjacent peaks is the MW of the amino acid residue difference between them. (A) PLQQPI. (B) RKQQFT. (C) QYQQYR.

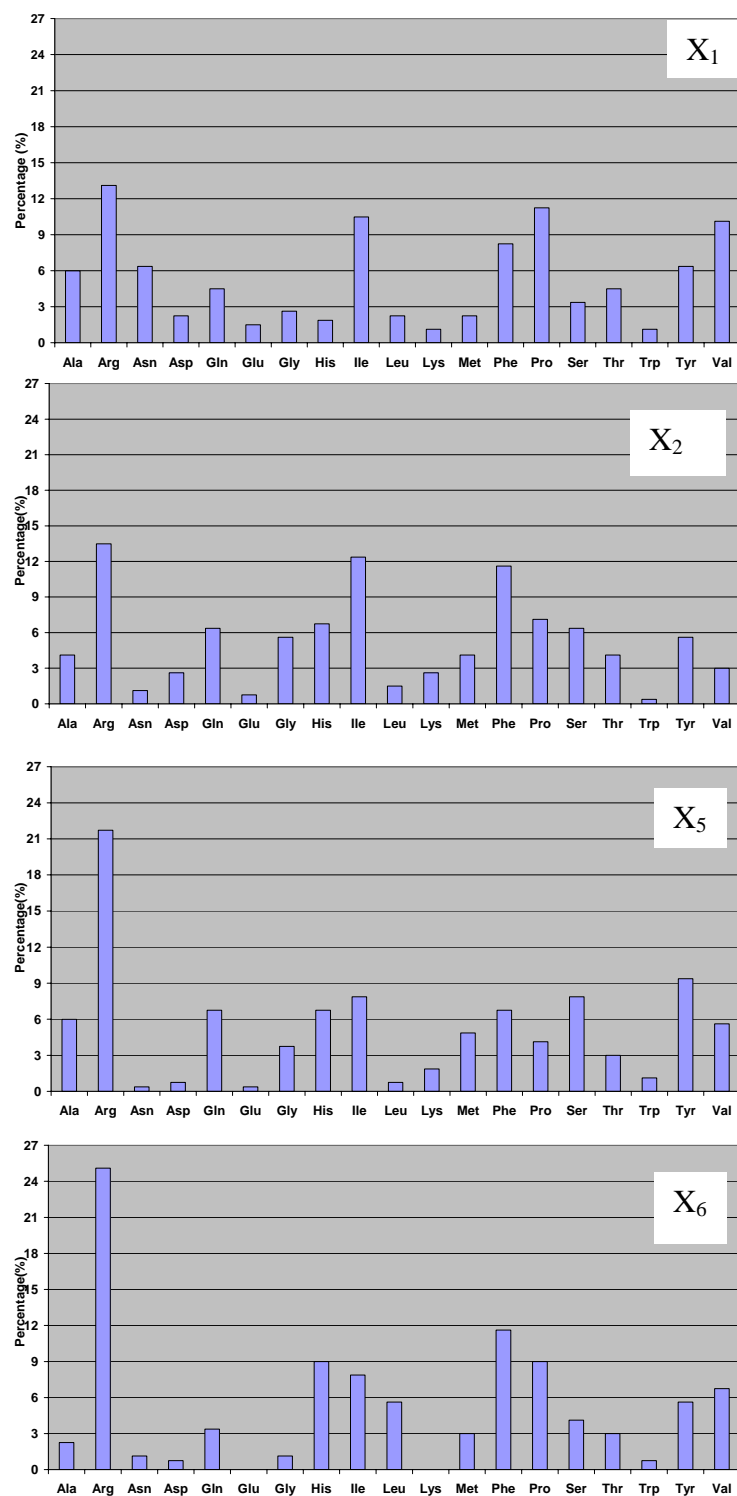

**Figure S6.** Amino acid frequency in the randomized positions in the peptide

X<sub>1</sub>X<sub>2</sub>QQX<sub>5</sub>X<sub>6</sub>.

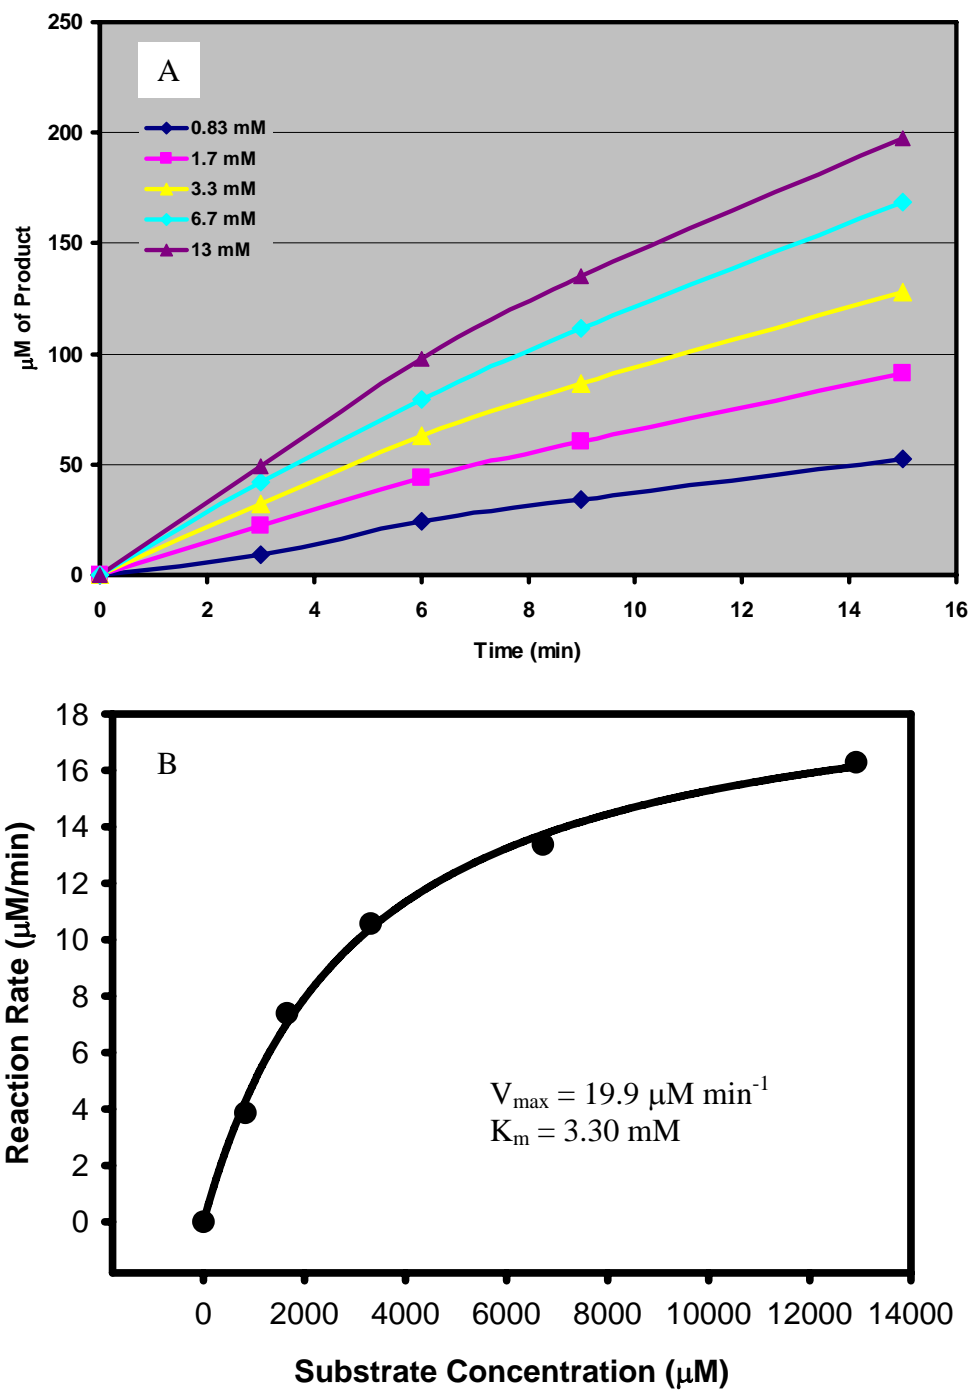

**Figure S7.** Sample of enzymatic reactions and curve fitting for Val-His-Gln-Gln-Gln-Arg. (A) Reaction progression curves. (B) Michaelis-Menten plot with fitted  $V_{\text{max}}$  and  $K_m$ .

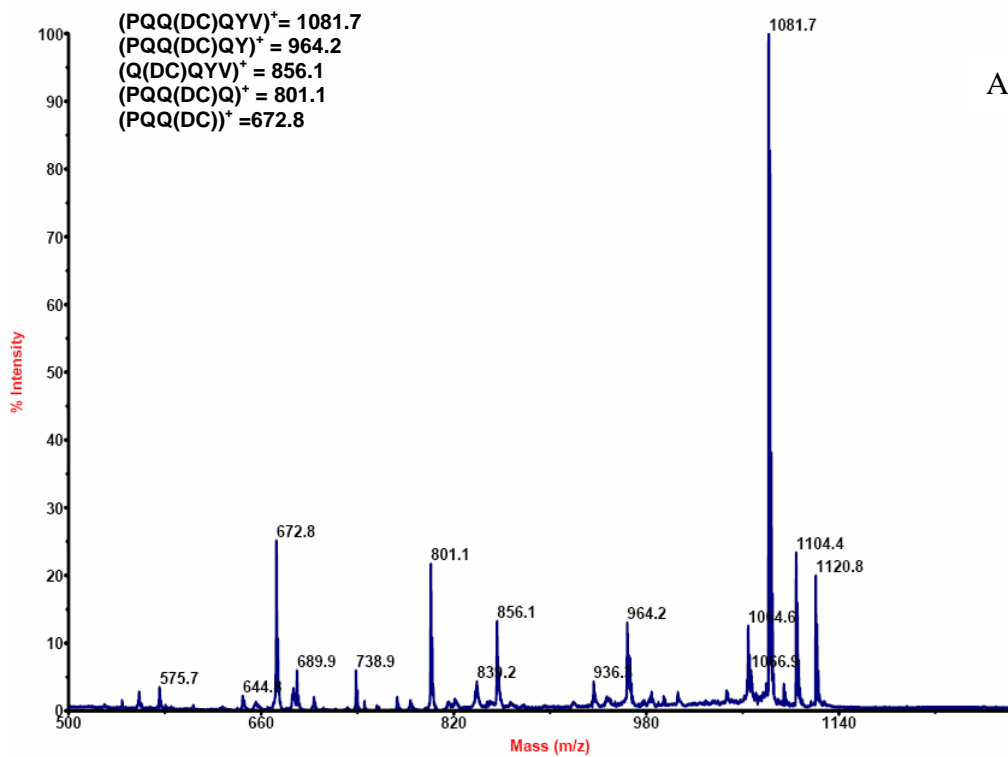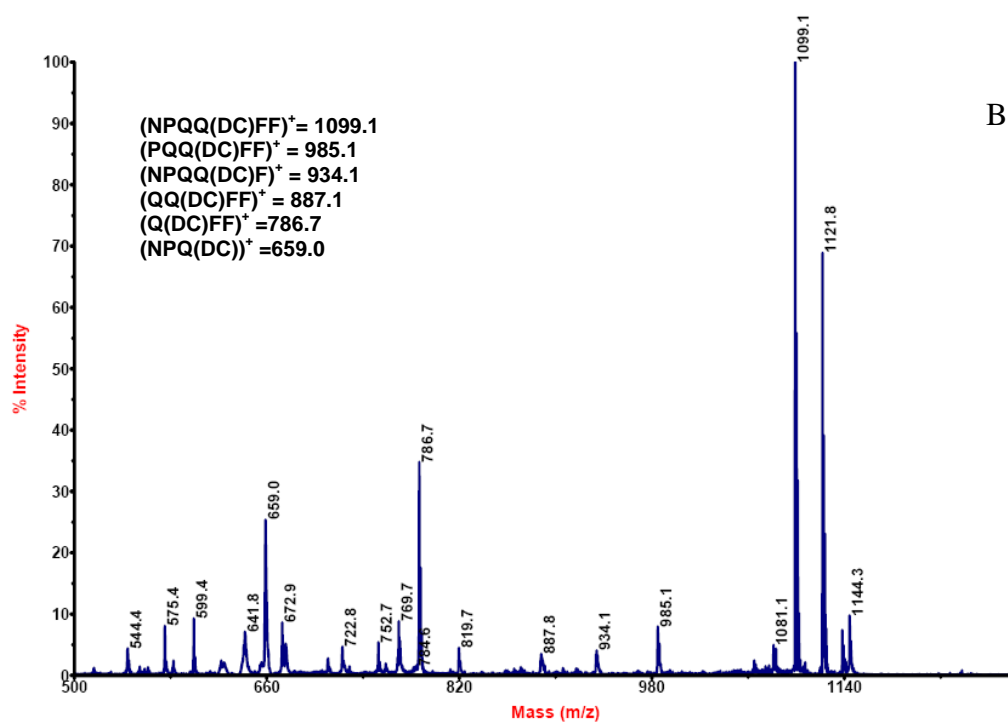

**Fig. S8.** MALDI PSD evaluation of peptide products. (A) Pro-Gln-Gln-Gln-Tyr-Val; (B)

Asn-Pro-Gln-Gln-Phe-Phe.

Table S4 Glutamine Peptide Sequences of TGase substrate

|     |     |     |     |     |     |
|-----|-----|-----|-----|-----|-----|
| Pro | Phe | Gln | Gln | Pro | Ile |
| Ile | Arg | Gln | Gln | Arg | Phe |
| Val | Arg | Gln | Gln | Pro | Phe |
| Pro | Asp | Gln | Gln | Arg | Val |
| Ile | Asn | Gln | Gln | Val | Arg |
| Arg | Met | Gln | Gln | Ile | Tyr |
| Pro | His | Gln | Gln | Gln | Phe |
| Tyr | Asp | Gln | Gln | Gly | Phe |
| Thr | Ala | Gln | Gln | His | Ile |
| Pro | Ile | Gln | Gln | Tyr | Pro |
| Arg | Phe | Gln | Gln | Ser | Met |
| Asp | Gly | Gln | Gln | Arg | Phe |
| Lys | Phe | Gln | Gln | Arg | Asp |
| Thr | Ala | Gln | Gln | Arg | Tyr |
| Arg | Asp | Gln | Gln | Met | Pro |
| Gln | Tyr | Gln | Gln | Tyr | Arg |
| Asp | Trp | Gln | Gln | Arg | Val |
| Arg | His | Gln | Gln | Ala | Phe |
| Phe | Gln | Gln | Gln | Met | His |
| Pro | Gly | Gln | Gln | Phe | Arg |
| Arg | Ile | Gln | Gln | Gly | Arg |
| Pro | Leu | Gln | Gln | Pro | Ile |
| Ala | Gly | Gln | Gln | Ile | Arg |
| Ile | Phe | Gln | Gln | Arg | Ile |
| Asn | Ile | Gln | Gln | Arg | Tyr |
| Val | Arg | Gln | Gln | Gly | Ile |
| Ile | Ile | Gln | Gln | Ile | Arg |
| Thr | Phe | Gln | Gln | Arg | Arg |
| Asn | Arg | Gln | Gln | Arg | His |
| Val | Arg | Gln | Gln | Phe | Ile |
| Gly | Pro | Gln | Gln | Val | Leu |
| Val | Ile | Gln | Gln | Thr | Arg |
| Arg | Gly | Gln | Gln | Pro | Arg |
| Arg | Lys | Gln | Gln | Phe | Thr |
| Arg | Asp | Gln | Gln | Arg | Pro |
| Asn | Gly | Gln | Gln | His | Phe |
| Phe | Ser | Gln | Gln | Arg | Met |
| Pro | Tyr | Gln | Gln | Glu | Leu |
| Asp | Gln | Gln | Gln | Ala | Met |
| Ser | Arg | Gln | Gln | Val | Val |
| Ser | Pro | Gln | Gln | Tyr | Ile |
| Val | Arg | Gln | Gln | Met | Phe |
| Asn | Phe | Gln | Gln | Tyr | Arg |
| His | Val | Gln | Gln | His | Pro |
| Ile | Gly | Gln | Gln | Arg | Met |
| Arg | Pro | Gln | Gln | Arg | Arg |
| Arg | Arg | Gln | Gln | Lys | Pro |

|     |     |     |     |     |     |
|-----|-----|-----|-----|-----|-----|
| Leu | Arg | Gln | Gln | Ser | Leu |
| Ile | Ile | Gln | Gln | Ser | His |
| Pro | Gln | Gln | Gln | Tyr | Val |
| Phe | Ile | Gln | Gln | Gln | Phe |
| Pro | Gln | Gln | Gln | Tyr | Val |
| Pro | Gln | Gln | Gln | Gln | Met |
| Tyr | Lys | Gln | Gln | Tyr | Arg |
| Phe | Met | Gln | Gln | Tyr | Arg |
| Glu | Ile | Gln | Gln | Val | Ile |
| Thr | Ile | Gln | Gln | Ser | Pro |
| Leu | Phe | Gln | Gln | Arg | Ser |
| Ser | Pro | Gln | Gln | Thr | Leu |
| Leu | His | Gln | Gln | His | Arg |
| Pro | Phe | Gln | Gln | Tyr | Arg |
| Pro | Met | Gln | Gln | Phe | Phe |
| Ala | Phe | Gln | Gln | Met | His |
| Phe | Arg | Gln | Gln | Phe | Pro |
| Ala | Ala | Gln | Gln | Gln | Arg |
| Tyr | Gln | Gln | Gln | Met | His |
| Arg | His | Gln | Gln | Gln | Ser |
| Phe | Tyr | Gln | Gln | Gln | Gln |
| Glu | His | Gln | Gln | Arg | Pro |
| Phe | Phe | Gln | Gln | Ile | Thr |
| Met | Phe | Gln | Gln | Ser | His |
| Ala | Phe | Gln | Gln | Ile | His |
| Phe | Ile | Gln | Gln | Gly | His |
| Pro | Leu | Gln | Gln | His | Gln |
|     |     | Gln | Gln | Phe | His |
| Val | His | Gln | Gln | Pro | Thr |
| Ile | Tyr | Gln | Gln | Val | Tyr |
| Asn | Ala | Gln | Gln | Arg | Ile |
| Phe | Ile | Gln | Gln | His | His |
| Ile | Phe | Gln | Gln | Tyr | Arg |
| Phe | Ser | Gln | Gln | Arg | Asp |
| Asn | Arg | Gln | Gln | Val | Val |
| His | Ala | Gln | Gln | His | Arg |
| Gly | Phe | Gln | Gln | Thr | Val |
| Arg | Arg | Gln | Gln | Ala | Pro |
| Phe | Val | Gln | Gln | Gly | Arg |
| Ala | Ile | Gln | Gln | Met | Ile |
| Pro | Thr | Gln | Gln | Arg | Ser |
| Asn | Thr | Gln | Gln | Arg | Met |
| Gln | Tyr | Gln | Gln | Ala | Arg |
| Val | Gly | Gln | Gln | Leu | Val |
| Arg | Thr | Gln | Gln | Arg | Val |
| Ile | Phe | Gln | Gln | Thr | Arg |
| Gln | Leu | Gln | Gln | Arg | Pro |
| Pro | Gln | Gln | Gln | Phe | Phe |
| Gln | Tyr | Gln | Gln | Arg | Trp |
| Pro | Ile | Gln | Gln | Val | His |

|     |     |     |     |     |     |
|-----|-----|-----|-----|-----|-----|
| Phe | Ala | Gln | Gln | Pro | Pro |
| Ala | Met | Gln | Gln | Ile | Phe |
| Ile | Ser | Gln | Gln | Pro | Val |
| Asn | Pro | Gln | Gln | Phe | Phe |
| Pro | Pro | Gln | Gln | Ile | Leu |
| Ala | Ser | Gln | Gln | Tyr | Phe |
| Tyr | Asp | Gln | Gln | Ala | Phe |
| Val | Tyr | Gln | Gln | Met | Val |
| Ser | Arg | Gln | Gln | Tyr | Val |
| Arg | His | Gln | Gln | Phe | Pro |
| Asn | Arg | Gln | Gln | Ser | Gln |
| Asn | Ile | Gln | Gln | Arg | Tyr |
| Arg | Ser | Gln | Gln | Phe | Ile |
| Arg | Ser | Gln | Gln | Ser | Ser |
| Gln | Phe | Gln | Gln | Pro | Phe |
| Lys | Thr | Gln | Gln | Gln | Arg |
| Asn | Pro | Gln | Gln | Met | Arg |
| Arg | Glu | Gln | Gln | Tyr | Arg |
| Ile | Pro | Gln | Gln | Tyr | Arg |
| Val | His | Gln | Gln | Gln | Arg |
| Asn | His | Gln | Gln | Trp | Ser |
| Ile | Met | Gln | Gln | Ile | Arg |
| Tyr | Asn | Gln | Gln | Arg | Leu |
| Pro | Ile | Gln | Gln | Asn | Arg |
|     | Met | Gln | Gln | Arg | Val |
| Pro | Gln | Gln | Gln | Tyr | Arg |
| Asp | Phe | Gln | Gln | Arg | Phe |
| Pro | His | Gln | Gln | His | Ile |
| Arg | Pro | Gln | Gln | Tyr | Pro |
| Pro | Phe | Gln | Gln | Arg | Arg |
| Ala | Leu | Gln | Gln | Ala | Arg |
| Ile | Gly | Gln | Gln | Ser | Tyr |
| Gln | Pro | Gln | Gln | Arg | Arg |
| Tyr | Lys | Gln | Gln | Arg | Phe |
| Tyr | Arg | Gln | Gln | Pro | Tyr |
| Gln | Gly | Gln | Gln | Val | Arg |
| Val | Phe | Gln | Gln | Arg | Gln |
| Met | Ile | Gln | Gln | His | Ile |
| Val | Thr | Gln | Gln | Met | Arg |
| Val | Ile | Gln | Gln | Gln | Tyr |
| Tyr | Arg | Gln | Gln | Ile | Pro |
| Ile | Val | Gln | Gln | Ile | His |
| Gln | Asp | Gln | Gln | Val | Arg |
| Ala | Asp | Gln | Gln | Arg | Val |
| Arg | Tyr | Gln | Gln | Val | Ala |
| Val | Ile | Gln | Gln | Tyr | Arg |
| Ile | Thr | Gln | Gln | Arg | Arg |
| Thr | Arg | Gln | Gln | His | Pro |
| Gln | Ile | Gln | Gln | Lys | Tyr |
| Ile | Thr | Gln | Gln | Trp | Arg |

|     |     |     |     |     |     |
|-----|-----|-----|-----|-----|-----|
| Phe | Thr | Gln | Gln | Arg | Gln |
| Ile | Tyr | Gln | Gln | Arg | Phe |
| Arg | Ile | Gln | Gln | Ala | Asn |
| Asn | Ser | Gln | Gln | Arg | Ala |
| Arg | Arg | Gln | Gln | Phe | Met |
| Pro | Ala | Gln | Gln | Ile | Asn |
| Ile | Ser | Gln | Gln | Arg | Tyr |
| Tyr | Ile | Gln | Gln | Tyr | Pro |
| Met | His | Gln | Gln | Phe | Tyr |
| Val | His | Gln | Gln | Gly | Leu |
| Tyr | Thr | Gln | Gln | Arg | Gly |
| Arg | Ile | Gln | Gln | Phe | Ser |
| Val | Arg | Gln | Gln | Lys | Pro |
| Val | Gln | Gln | Gln | Gln | Asn |
| Arg | Ile | Gln | Gln | Tyr | Gln |
| His | Arg | Gln | Gln | Phe | Arg |
| Val | Phe | Gln | Gln | Ser | Ile |
| Pro | Phe | Gln | Gln | Arg | Val |
| Thr | Ile | Gln | Gln | Phe | Arg |
| Phe | Gly | Gln | Gln | Gln | Pro |
| Ile | Phe | Gln | Gln | His | Ser |
| Ile | Val | Gln | Gln | Ser | His |
| Glu | Gln | Gln | Gln | Ile | Trp |
| Phe | Ile | Gln | Gln | Ile | Arg |
| Arg | Glu | Gln | Gln | Ala | Ala |
| Phe | Phe | Gln | Gln | Asn | Thr |
| Val | Ile | Gln | Gln | Val | Gln |
| Val | Ile | Gln | Gln | Ser | Gln |
| Tyr | Gln | Gln | Gln | Ile | Leu |
| Arg | Gln | Gln | Gln | Ala | Ala |
| Val | Met | Gln | Gln | Thr | His |
| Phe | Ser | Gln | Gln | Val | Arg |
| Val | Met | Gln | Gln | Thr | Ile |
| Gln | Gly | Gln | Gln | Ala | His |
| Gly | Phe | Gln | Gln | Thr | Leu |
| Pro | Phe | Gln | Gln | Ile | His |
| Ser | Gln | Gln | Gln | His | Ile |
| Ile | Arg | Gln | Gln | Trp | Thr |
| Ile | Phe | Gln | Gln | Met | His |
| Phe | Arg | Gln | Gln | Ser | Phe |
| Phe | Pro | Gln | Gln | Ser | Ile |
| Ala | His | Gln | Gln | Ala | His |
| Ile | Arg | Gln | Gln | Ile | Ala |
| Val | His | Gln | Gln | His | Val |
| Ser | Gly | Gln | Gln | Arg | Ile |
| Tyr | Ala | Gln | Gln | Arg | Ser |
| Leu | Ser | Gln | Gln | His | Arg |
| Ile | Gln | Gln | Gln | His | Ile |
| Ala | Phe | Gln | Gln | Leu | Thr |
| Gln | Phe | Gln | Gln | Arg | Gly |

|     |     |     |     |     |     |
|-----|-----|-----|-----|-----|-----|
| Tyr | Pro | Gln | Gln | Gln | Pro |
| Trp | Arg | Gln | Gln | Asp | His |
| Ser | His | Gln | Gln | Arg | Val |
| Tyr | Thr | Gln | Gln | Arg | Pro |
| Trp | Arg | Gln | Gln | Arg | Pro |
| Tyr | Pro | Gln | Gln | Gln | Pro |
| Trp | Arg | Gln | Gln | Asp | His |
| Thr | Ala | Gln | Gln | Val | Tyr |
| Thr | His | Gln | Gln | Arg | Val |
| Asn | Arg | Gln | Gln | Ile | Gly |
| Ile | Tyr | Gln | Gln | Gln | Leu |
| Arg | Ser | Gln | Gln | Gln | Phe |
| Val | Ile | Gln | Gln | Met | Arg |
| Asn | Arg | Gln | Gln | Arg | Leu |
| Lys | Arg | Gln | Gln | Pro | Phe |
| Tyr | Lys | Gln | Gln | Gly | Leu |
| His | Lys | Gln | Gln | Met | Phe |
| Leu | Pro | Gln | Gln | Tyr | Phe |
| Pro | Met | Gln | Gln | His | Phe |
| Arg | Ile | Gln | Gln | Ile | Pro |
| Leu | Pro | Gln | Gln | Ile | Arg |
| Val | Ser | Gln | Gln | Ala | Tyr |
| Ala | Arg | Gln | Gln | Ser | Arg |
| Pro | Tyr | Gln | Gln | Arg | His |
| Arg | Arg | Gln | Gln | Gly | Ala |
| Ile | Phe | Gln | Gln | Val | Ser |
| Thr | Phe | Gln | Gln | Arg | Phe |
| Asp | Met | Gln | Gln | Arg | Ile |
| Met | Gln | Gln | Gln | Ser | Leu |
| Tyr | Arg | Gln | Gln | Ala | His |
| Asn | Arg | Gln | Gln | Arg | Pro |
| Thr | Val | Gln | Gln | Gln | Arg |
| Thr | His | Gln | Gln | Arg | Tyr |
| Arg | Ile | Gln | Gln | Tyr | Ser |
| Ala | Ala | Gln | Gln | Arg | Ser |
| Met | Arg | Gln | Gln | Tyr | Arg |
| Ala | Val | Gln | Gln | Phe | His |
| Phe | Tyr | Gln | Gln | Ser | Leu |
| Ile | Pro | Gln | Gln | Met | Arg |
| Val | Lys | Gln | Gln | Lys | Arg |
| Arg | Tyr | Gln | Gln | Tyr | Gln |
| Gly | His | Gln | Gln | Phe | Arg |
| Pro | Gly | Gln | Gln | Ser | Phe |
| Arg | Ile | Gln | Gln | Gln | Arg |
| Ala | Val | Gln | Gln | Gly | Phe |
| Gln | Ser | Gln | Gln | Arg | Arg |
| Arg | Tyr | Gln | Gln | His | Arg |
| Val | Ser | Gln | Gln | Tyr | Arg |
| Ser | Tyr | Gln | Gln | Ala | His |
| His | Met | Gln | Gln | Pro | Arg |

|     |     |     |     |     |     |
|-----|-----|-----|-----|-----|-----|
| Pro | Gly | Gln | Gln | Ile | Phe |
| Gly | Pro | Gln | Gln | Ala | Arg |
| Pro | Phe | Gln | Gln | Gly | Phe |
| Arg | Ile | Gln | Gln | Ala | Thr |
| Gly | Arg | Gln | Gln | Arg | Thr |
| Phe | Val | Gln | Gln | Val | Arg |
| Met | Gln | Gln | Gln | Ser | Leu |
| Phe | Gly | Gln | Gln | Tyr | Ile |
| Glu | Ser | Gln | Gln | Phe | Tyr |
| Thr | Ser | Gln | Gln | Arg | Arg |
| Asn | Pro | Gln | Gln | Arg | Arg |
| Val | Asn | Gln | Gln | Ile | Arg |
| Ile | Ala | Gln | Gln | Ser | Arg |
| Arg | Thr | Gln | Gln | Thr | Arg |
| Ala | Arg | Gln | Gln | Ser | Arg |
| Asp | Ile | Gln | Gln | His | Arg |
| Gly | Pro | Gln | Gln | Gln | Phe |
| Pro | Phe | Gln | Gln | Pro | Ile |
| Ile | Arg | Gln | Gln | Arg | Phe |
| Val | Arg | Gln | Gln | Pro | Phe |

## References

- (1) Kahlem, P.; Terre, C.; Green, H.; Dijan, P., *Proceedings of the National Academy of Science* **1996**, 93, 14580.
- (2) Gorman, J.; Folk, J., *Journal of Biological Chemistry* **1980**, 255, 419.
- (3) Pastor, M.; Diez, A.; Perez-Paya, E.; Abad, C., *FEBS Letter* **1999**, 451, 231.
- (4) Hohenadl, C.; Mann, K.; Mayer, U.; Timpl, R.; Paulsson, M.; Aeschlimann, D., *Journal of Biological Chemistry* **1995**, 270, 23415.
- (5) Chen, R.; Doolittle, R., *Biochemistry* **1971**, 10, 4486.
- (6) Parameswaran, K. N.; Velasco, P. T.; Wilson, J.; Lorand, L., *Proceedings of the National Academy of Sciences of the United States of America* **1990**, 87, 8472.
- (7) Sugimura, Y.; Hosono, M.; Wada, F.; Yoshimura, T.; Maki, M.; Hitomi, K., *Journal of Biological Chemistry* **2006**, 281, 17699.
